# Supplementary material for: Facile synthesis and characterization of bio-organometallic compounds and their biological activity contour against human pathogens
Source: Royal Society of Chemistry journal article supplement (doi:10.1039/c4ra08737b), 2014-12-09
Supplement: c4ra08737b1.pdf [file c4ra08737b1.pdf]

## Supplementary File

### Facile Synthesis and Characterization of Bio-Organometallic Compounds and their Biological Activity Contour against Human Pathogens†

Mathiyazhagan Arun Divakar<sup>a</sup>, Velnathan Sudhamani<sup>a</sup>, Sivakumar Shanmugam<sup>a\*</sup>, Thillaichidambaram Muneeswaran<sup>b</sup>, Sembulingam Tamilzhalagan<sup>c</sup>, Muthiah Ramakritinan<sup>b</sup>, Kumaresan Ganesan<sup>c</sup>

<sup>a</sup> Department of Organic Chemistry, School of Chemistry, Madurai Kamaraj University, Madurai – 625 021.

<sup>b</sup> Department of Marine and Coastal Studies, School of Energy, Environment and Natural Resources, Madurai Kamaraj University, Madurai – 625 021.

<sup>c</sup> Cancer Genetics Laboratory, Department of Genetics, Centre for Excellence in Genomic Sciences, School of Biological Sciences, Madurai Kamaraj University, Madurai – 625 021, India.

**<sup>1</sup>H & <sup>13</sup>C NMR spectra of  
ferrocenyl(4-(aryl)-1*H*-pyrrol-3-yl)methanone - 2a-h**

**<sup>1</sup>H & <sup>13</sup>C NMR spectra of  
(1-methyl-4-(aryl)-1*H*-pyrrol-3-yl)(ferrocenyl)methanone - 3a-h  
and**

**LC-MS SPECTRA of some representative PYRROLES**

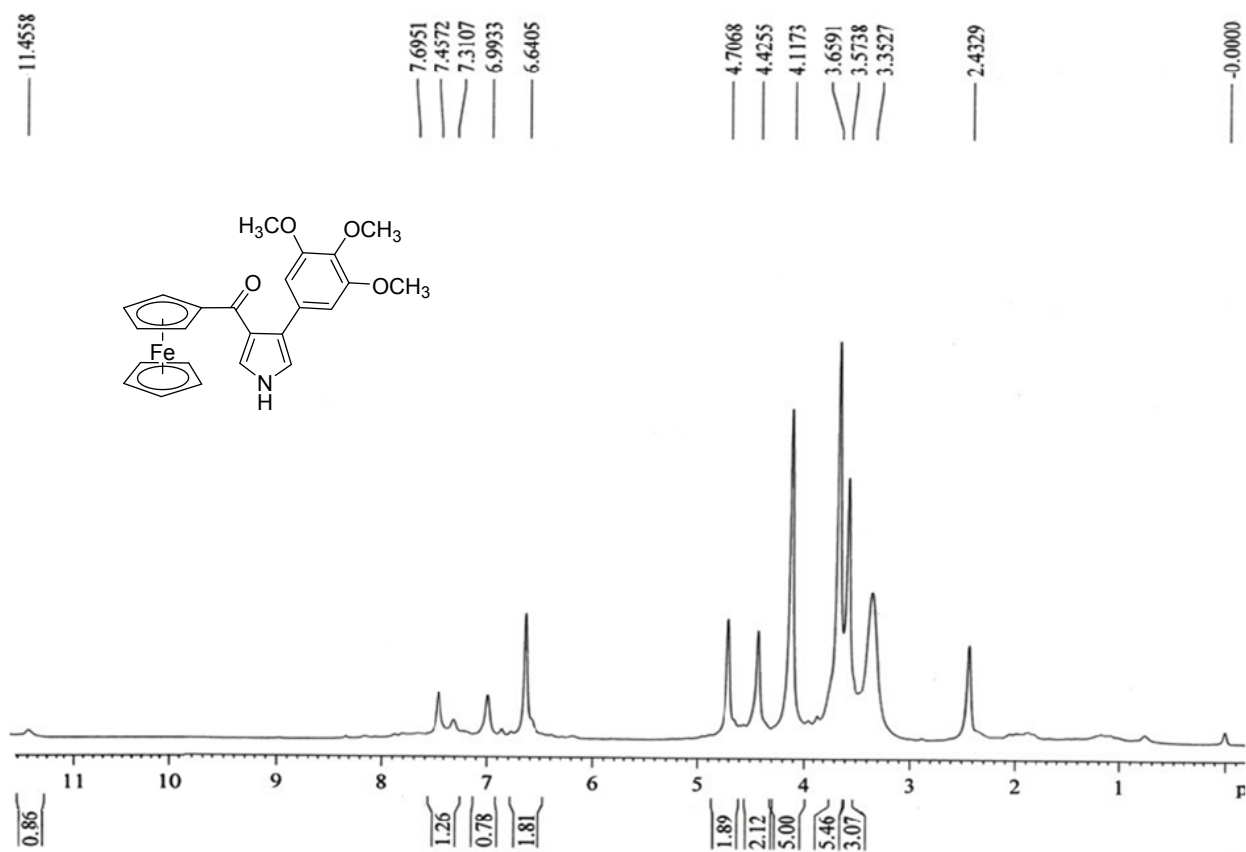

<sup>1</sup>H NMR (400 MHz, DMSO-d<sub>6</sub>): ferrocenyl(4-(3,4,5-trimethoxyphenyl)-1H-pyrrol-3-yl)methanone **2a**

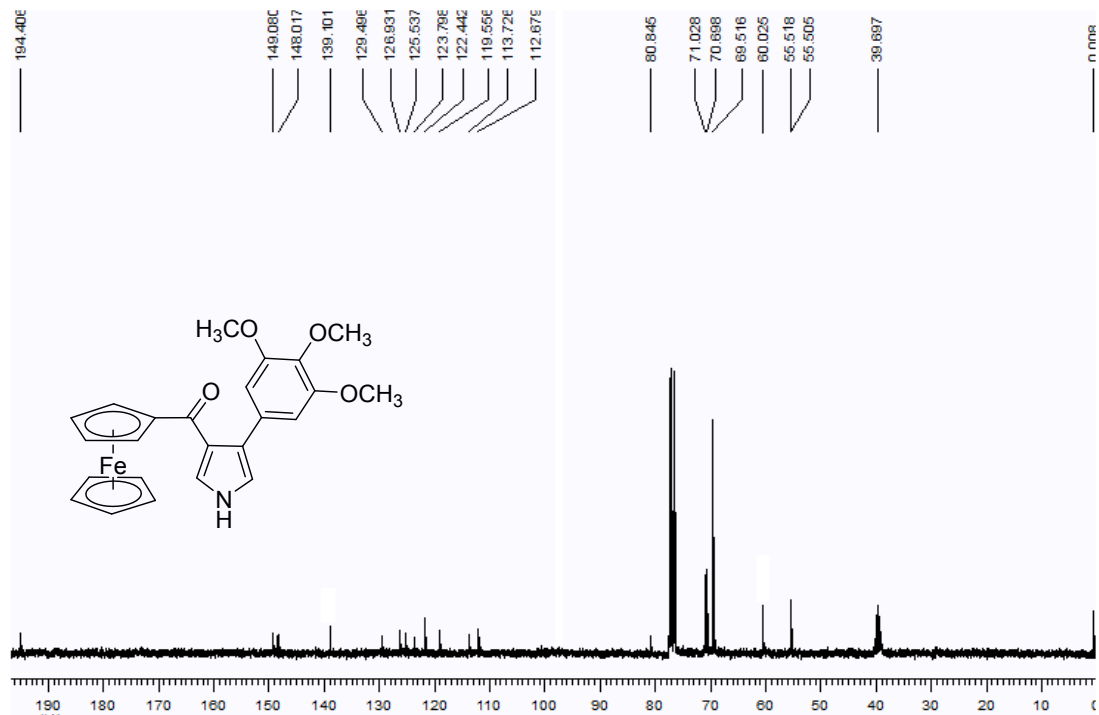

<sup>13</sup>C NMR (75 MHz, DMSO-d<sub>6</sub>): ferrocenyl(4-(3,4,5-trimethoxyphenyl)-1H-pyrrol-3-yl)methanone **2a**

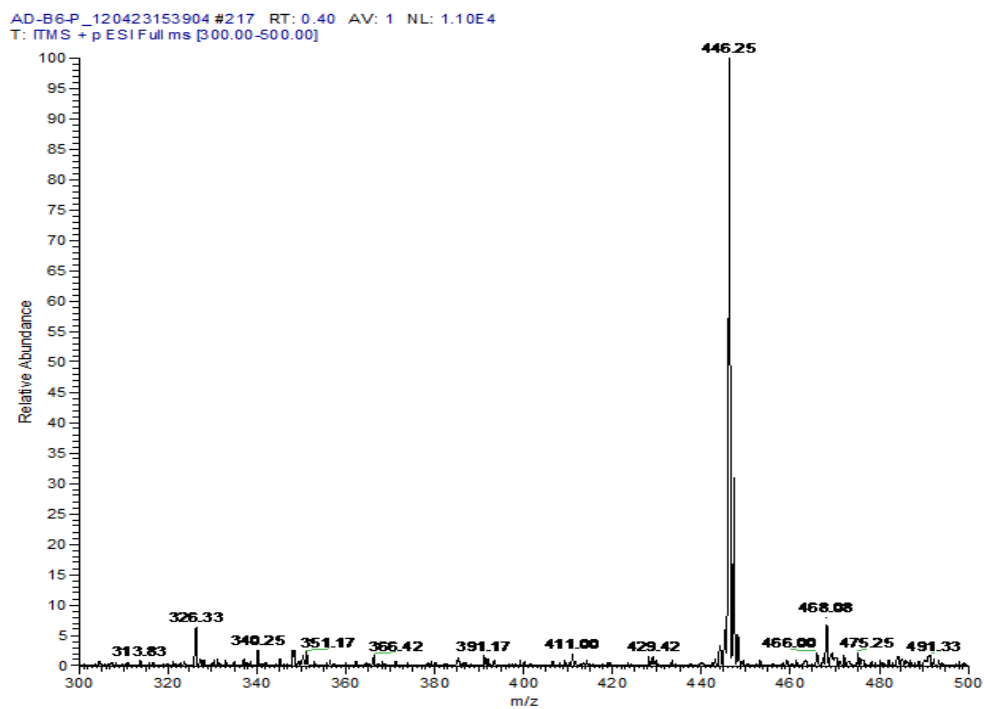

LC-MS: ferrocenyl(4-(3,4,5-trimethoxyphenyl)-1H-pyrrol-3-yl)methanone **2a**

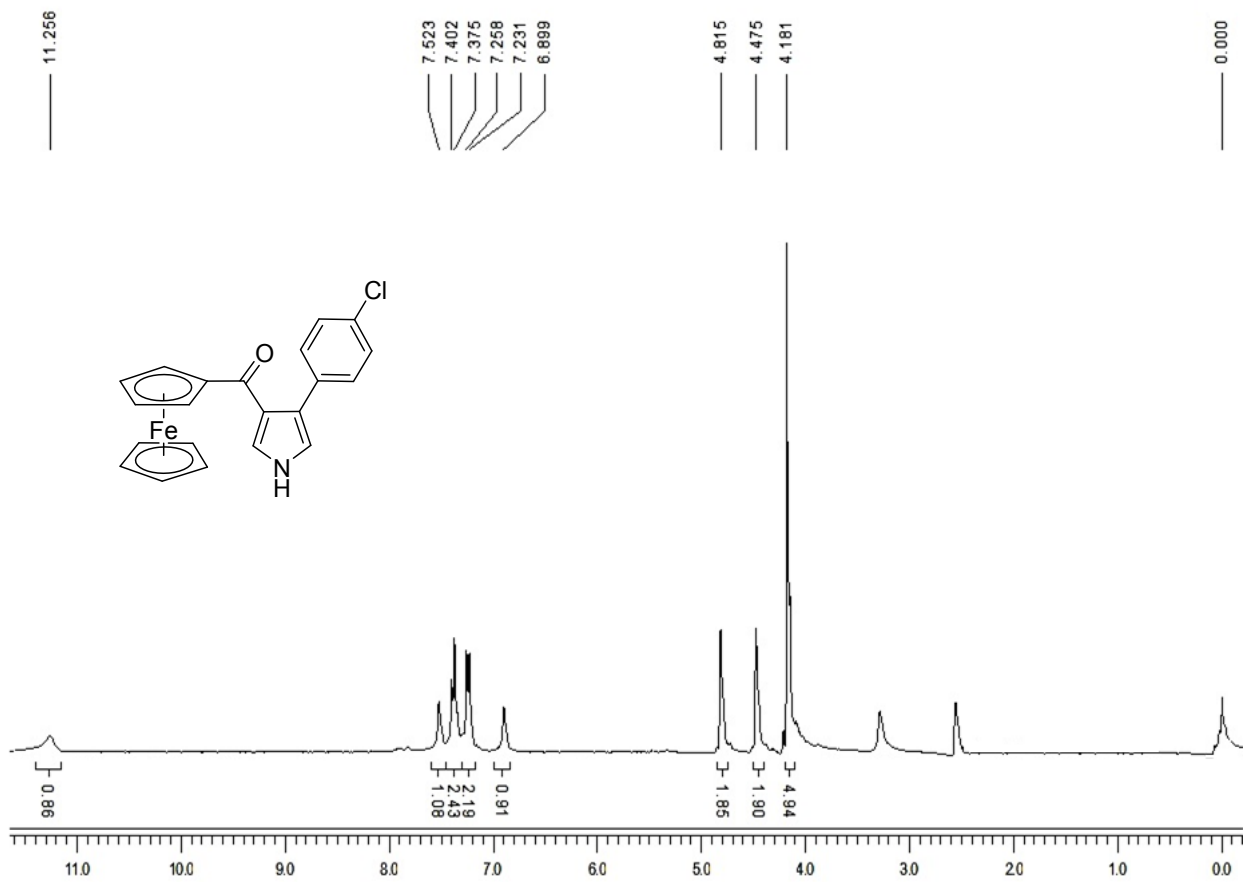

<sup>1</sup>H NMR (300 MHz, DMSO-d<sub>6</sub>): ferrocenyl(4-(4-chlorophenyl)-1H-pyrrol-3-yl)methanone **2b**

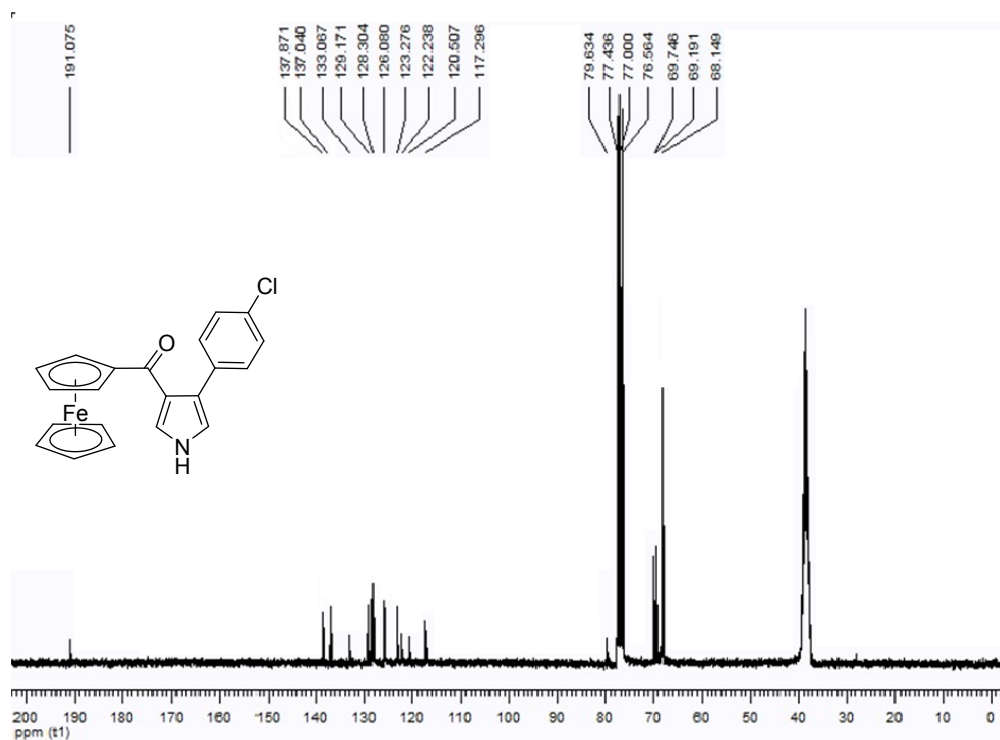

<sup>13</sup>C NMR (75 MHz, DMSO-d<sub>6</sub>): ferrocenyl(4-(4-chlorophenyl)-1H-pyrrol-3-yl)methanone **2b**

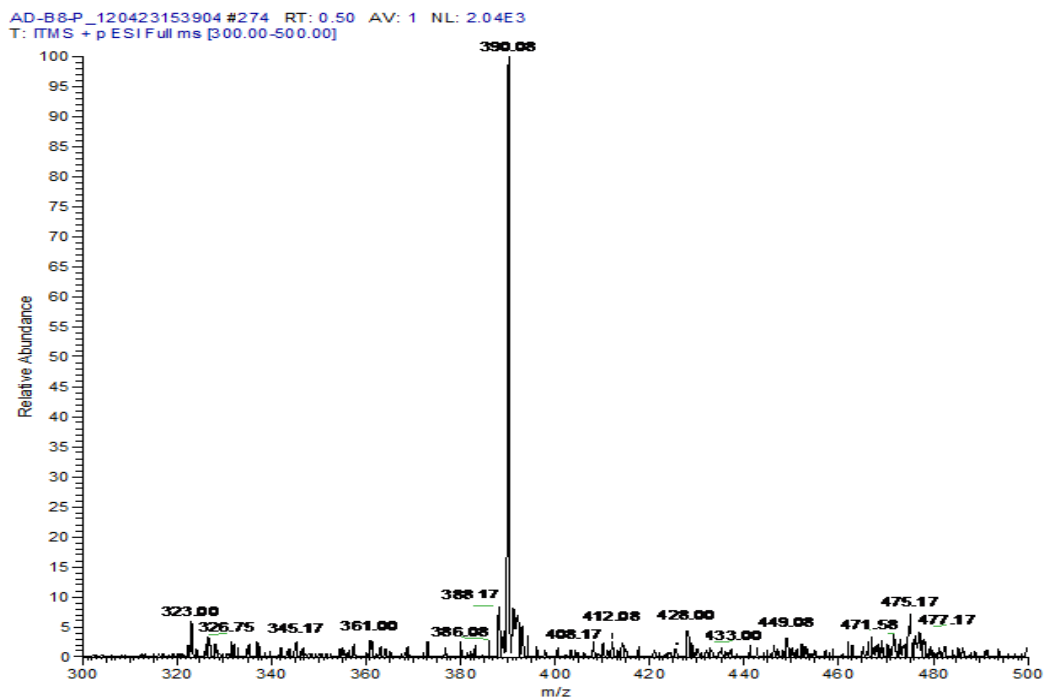

LC-MS: ferrocenyl(4-(4-chlorophenyl)-1H-pyrrol-3-yl)methanone **2b**

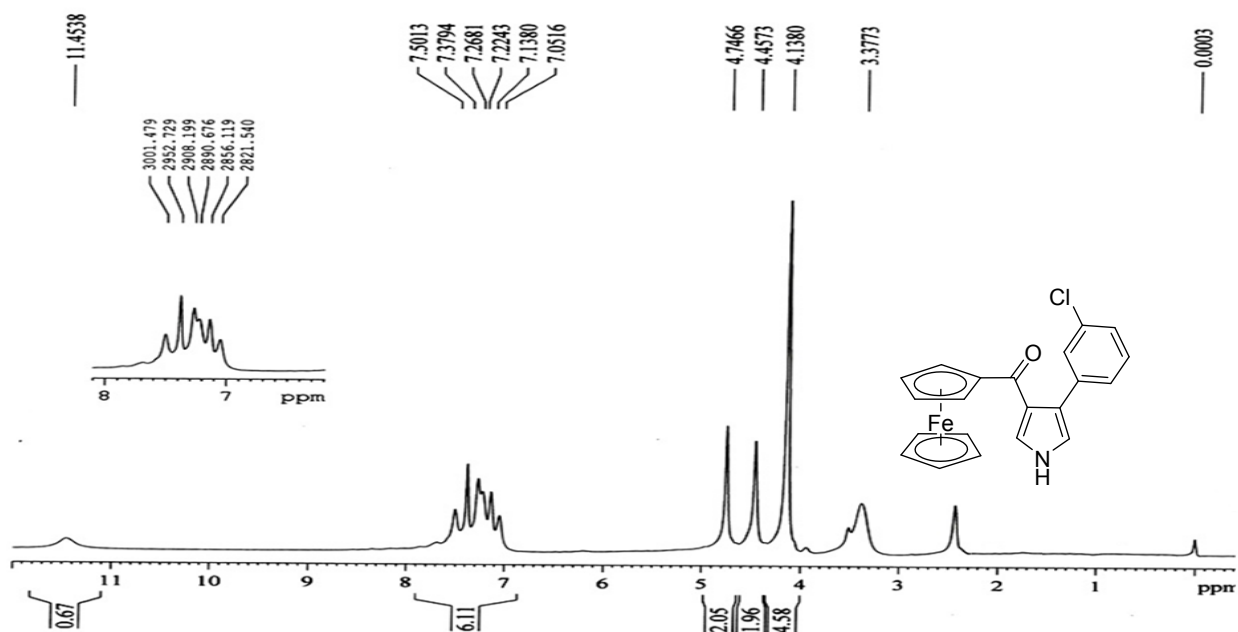

$^1\text{H}$  NMR (400 MHz, DMSO- $d_6$ ): ferrocenyl(4-(3-chlorophenyl)-1*H*-pyrrol-3-yl)methanone **2c**

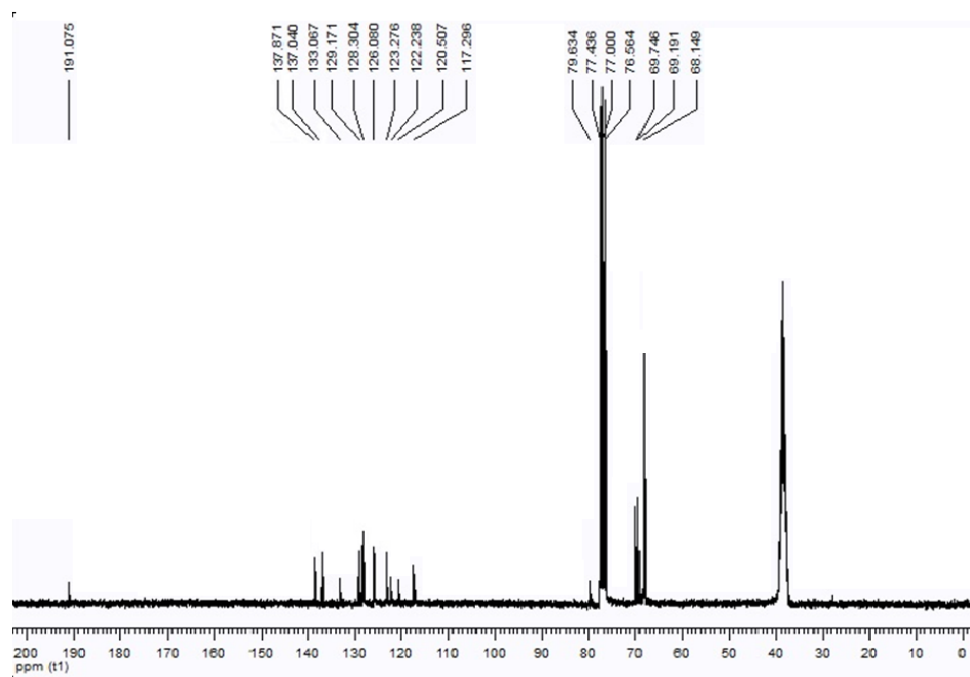

$^{13}\text{C}$  NMR (75 MHz, DMSO- $d_6$ ): ferrocenyl(4-(3-chlorophenyl)-1*H*-pyrrol-3-yl)methanone **2c**

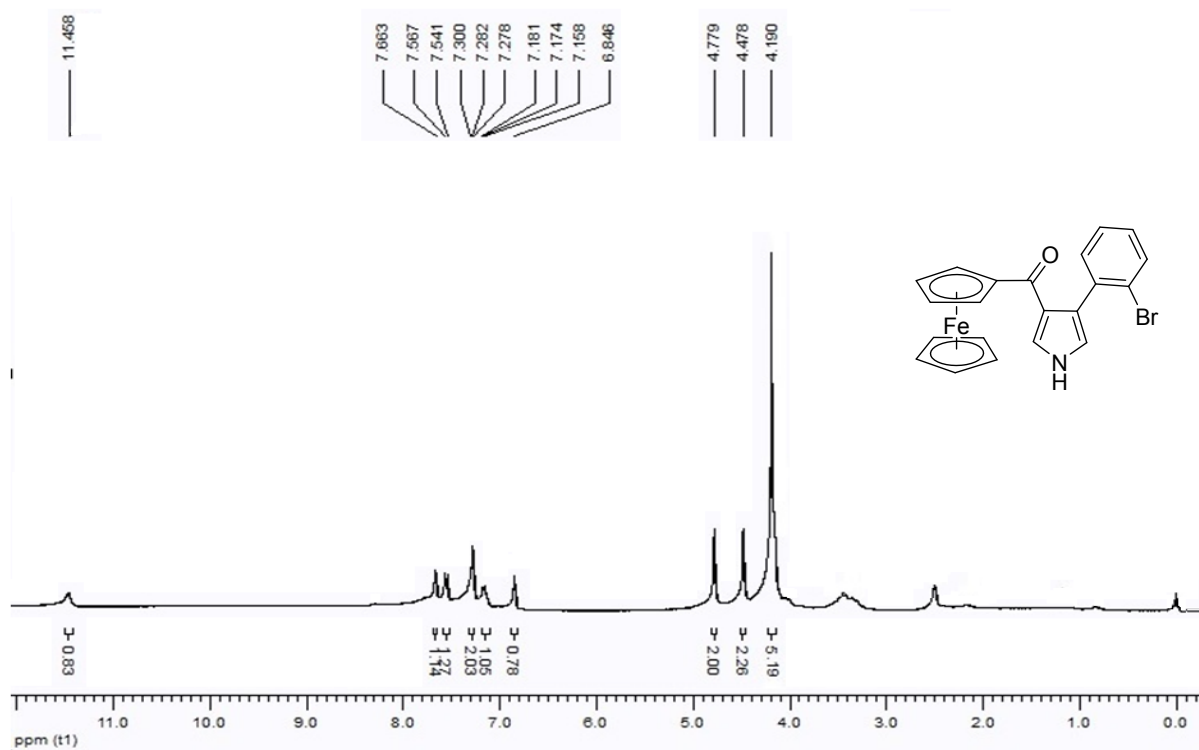

<sup>1</sup>H NMR (300 MHz, DMSO-d<sub>6</sub>): ferrocenyl(4-(2-bromophenyl)-1H-pyrrol-3-yl)methanone **2d**

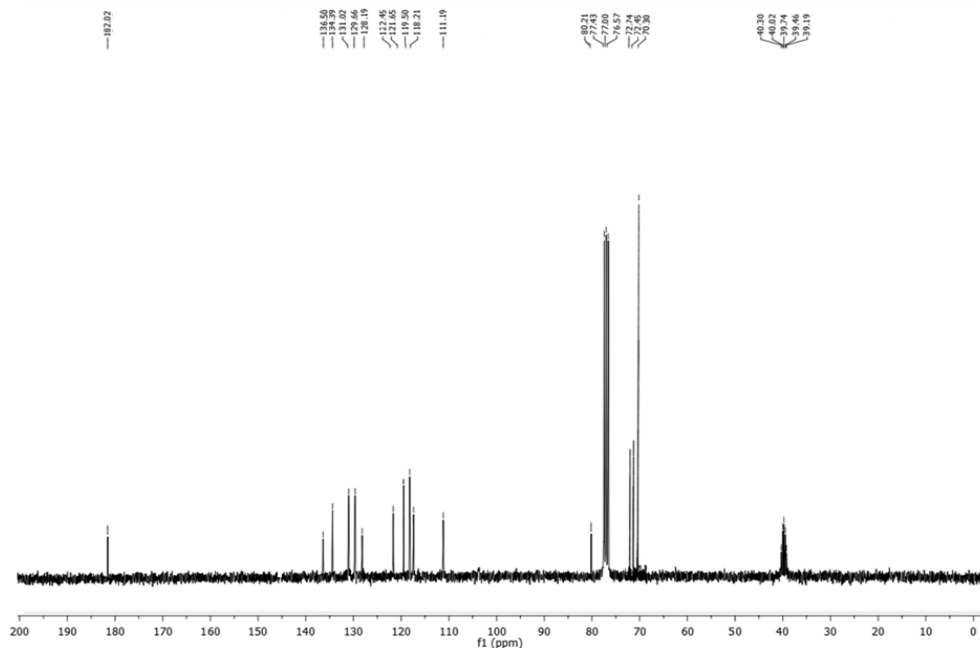

$^{13}\text{C}$  NMR (75 MHz,  $\text{DMSO-d}_6$ ): ferrocenyl(4-(2-bromophenyl)-1*H*-pyrrol-3-yl)methanone **2d**

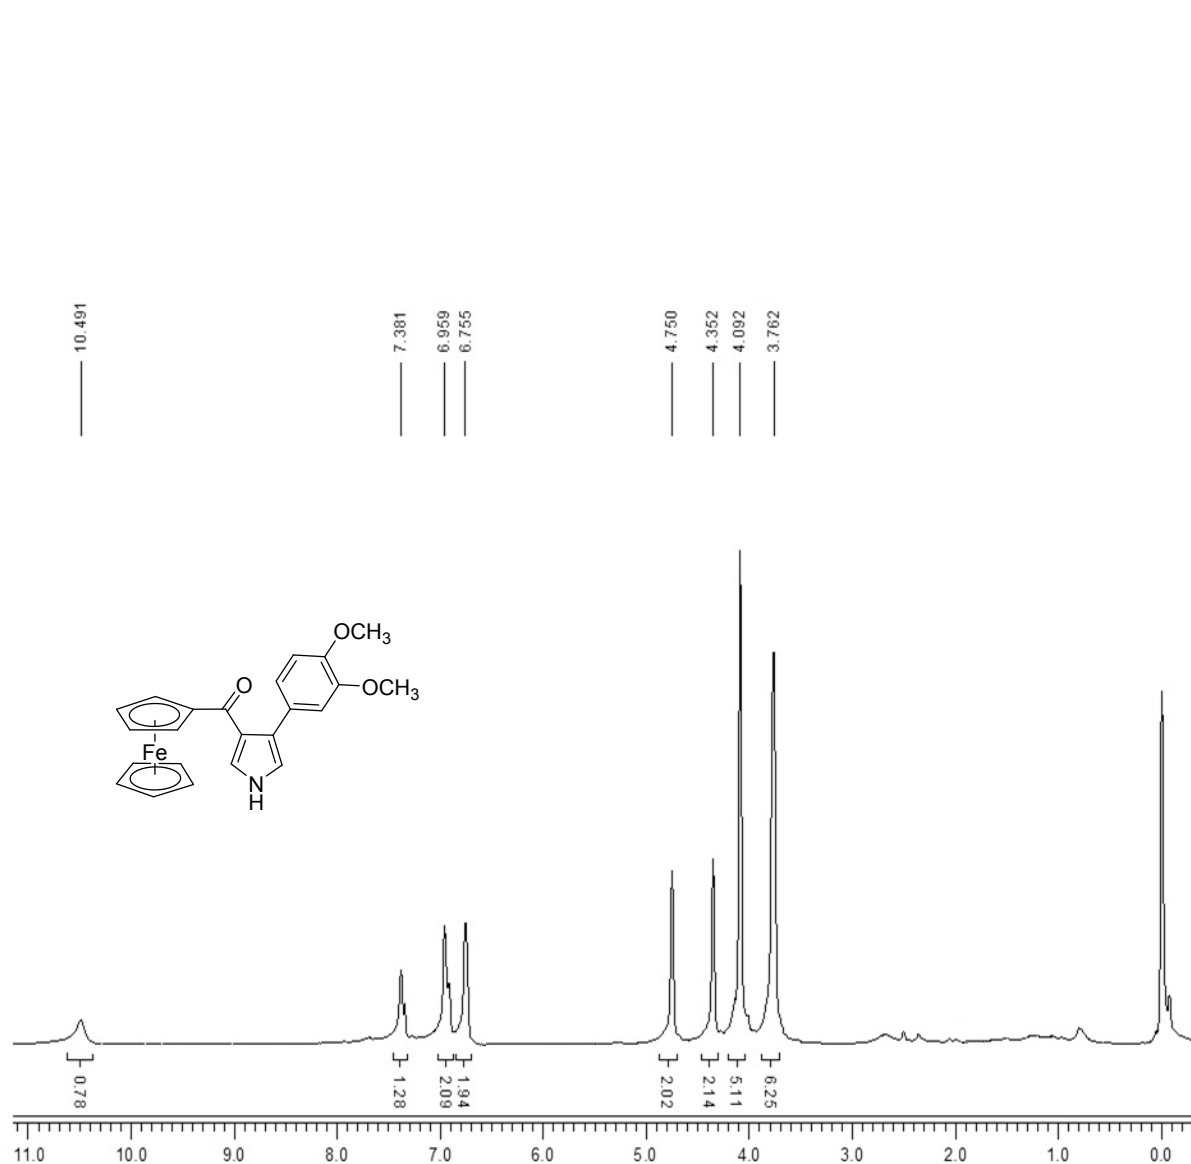

$^1\text{H}$  NMR (300 MHz,  $\text{DMSO-d}_6$ ): ferrocenyl(4-(3,4-dimethoxyphenyl)-1*H*-pyrrol-3-yl)methanone **2e**



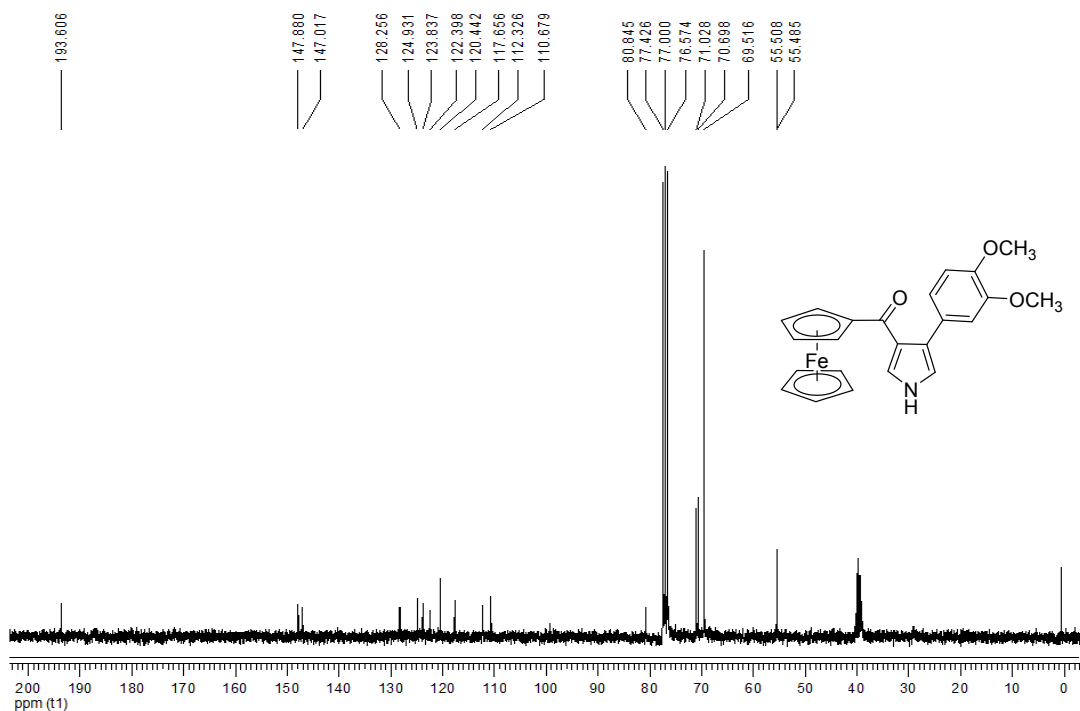

$^{13}\text{C}$  NMR (75 MHz, DMSO- $d_6$ ): ferrocenyl(4-(3,4-dimethoxyphenyl)-1H-pyrrol-3-yl)methanone **2e**

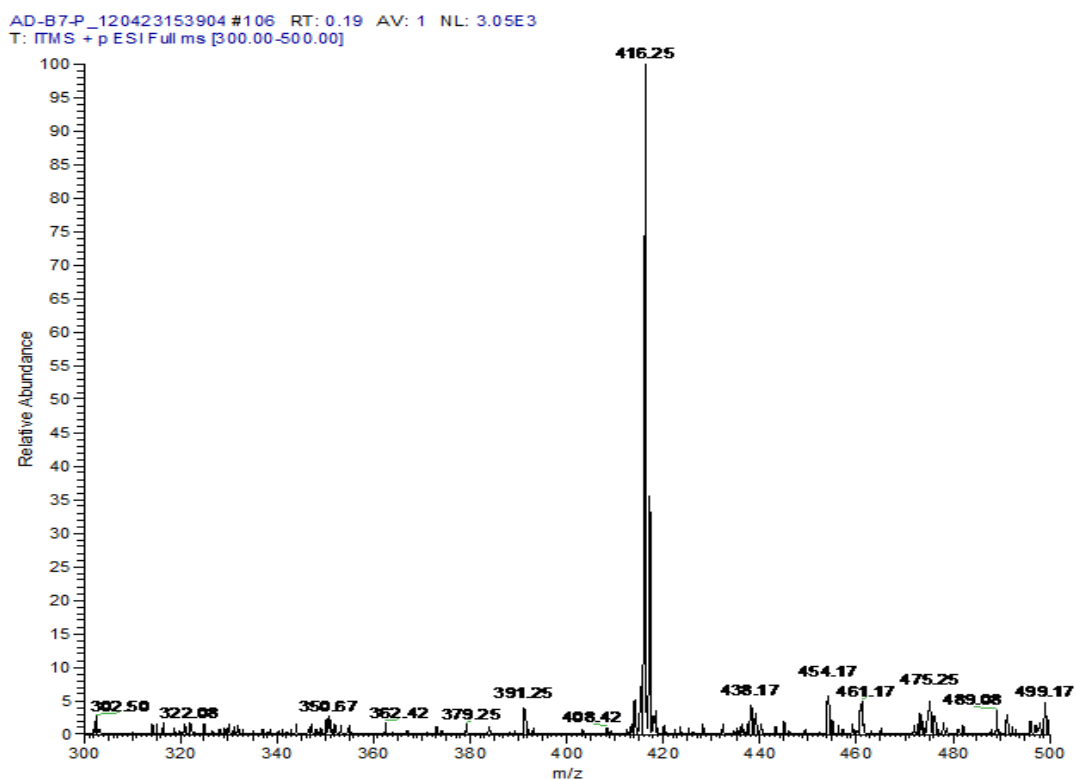

LC-MS: ferrocenyl(4-(3,4-dimethoxyphenyl)-1H-pyrrol-3-yl)methanone **2e**

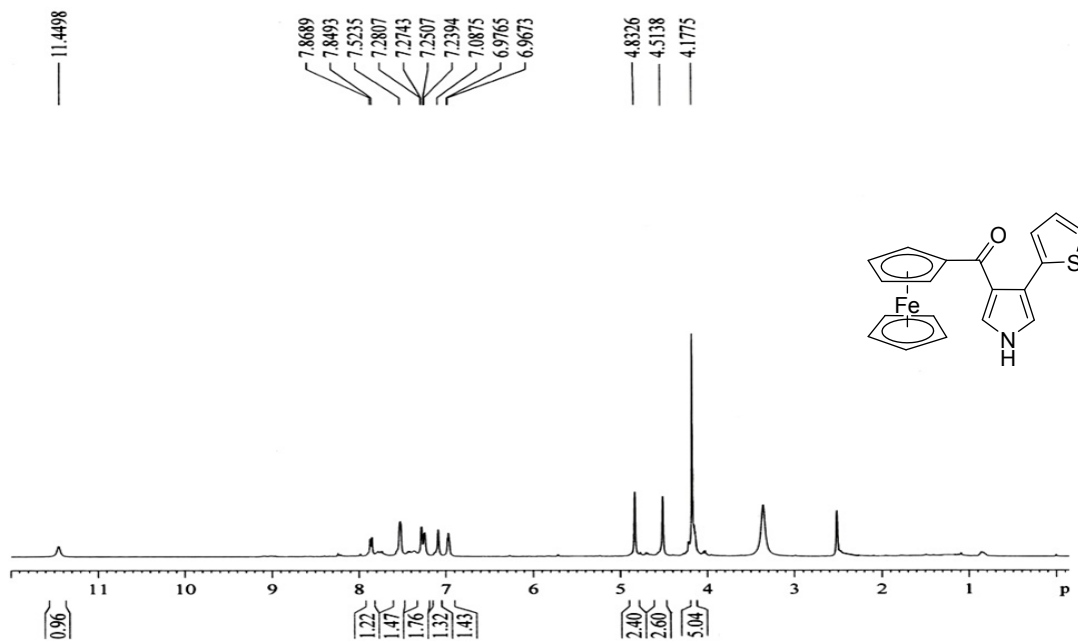

<sup>1</sup>H NMR (400 MHz, DMSO-d<sub>6</sub>): ferrocenyl(4-(thiophen-2-yl)-1H-pyrrol-3-yl)methanone **2f**

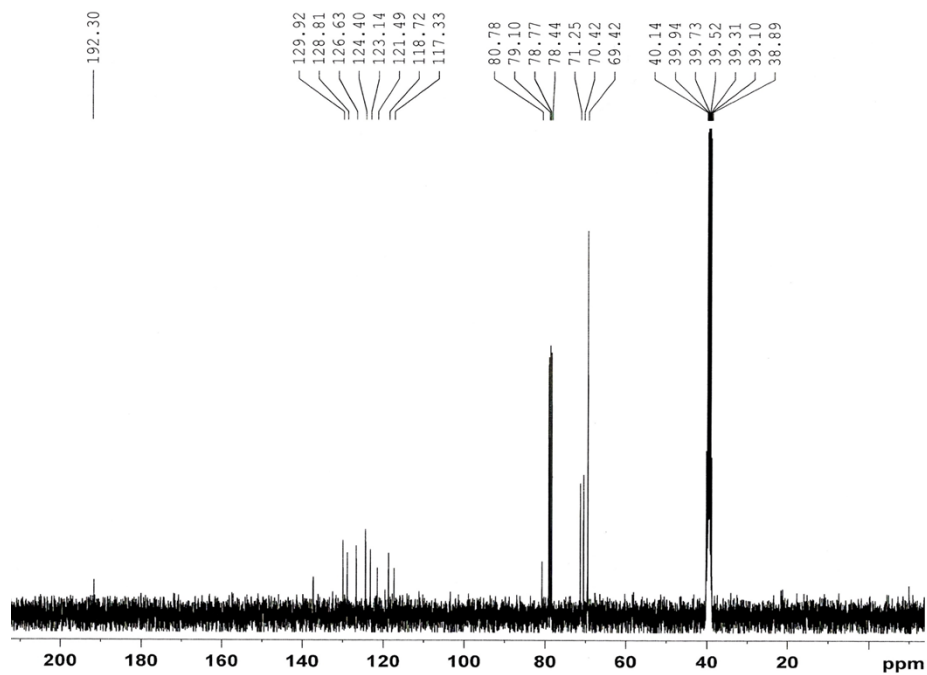

<sup>13</sup>C NMR (75 MHz, DMSO-d<sub>6</sub>): ferrocenyl(4-(thiophen-2-yl)-1H-pyrrol-3-yl)methanone **2f**

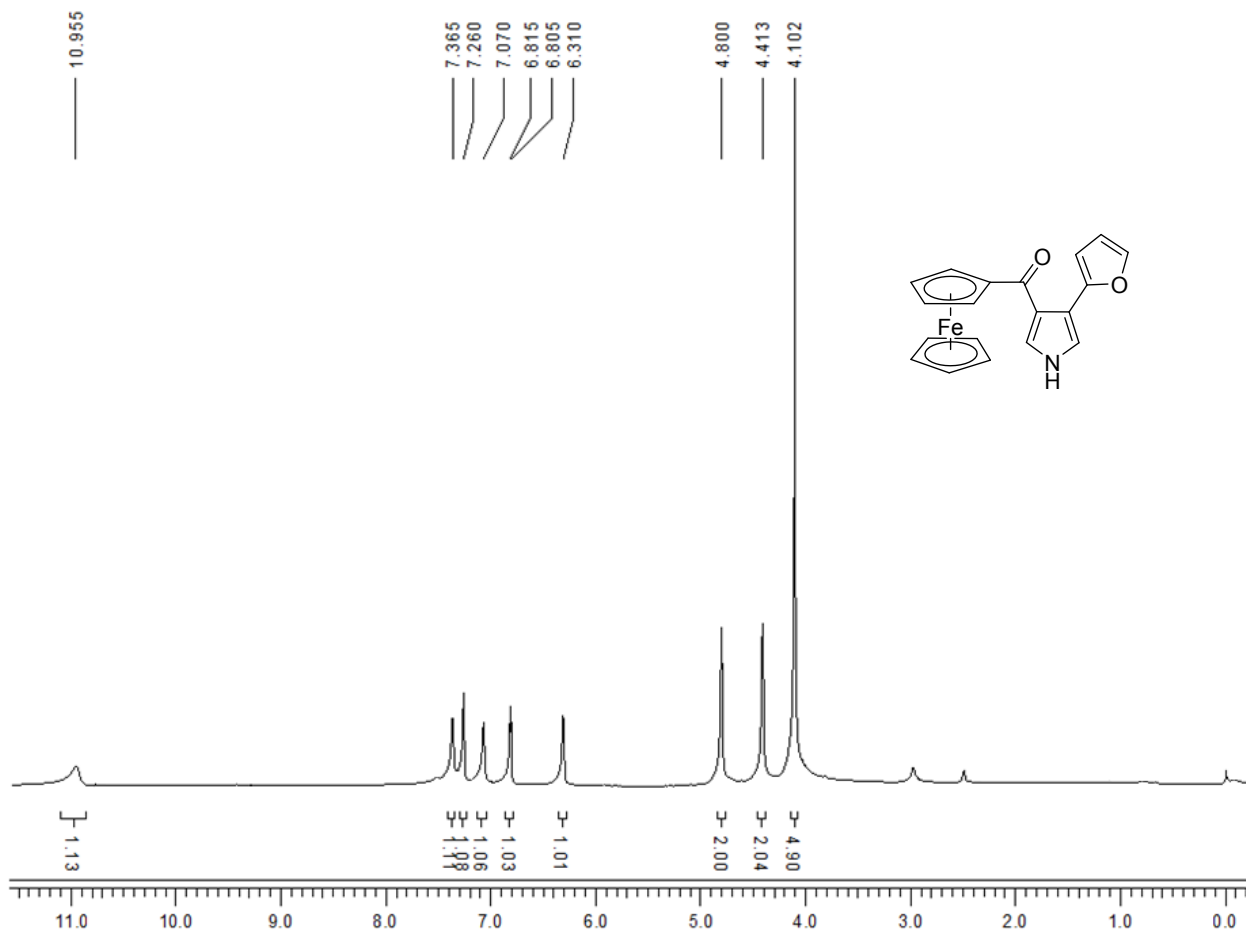

<sup>1</sup>H NMR (300 MHz, DMSO-d<sub>6</sub>): ferrocenyl(4-(furane-2-yl)-1H-pyrrol-3-yl)methanone **2g**

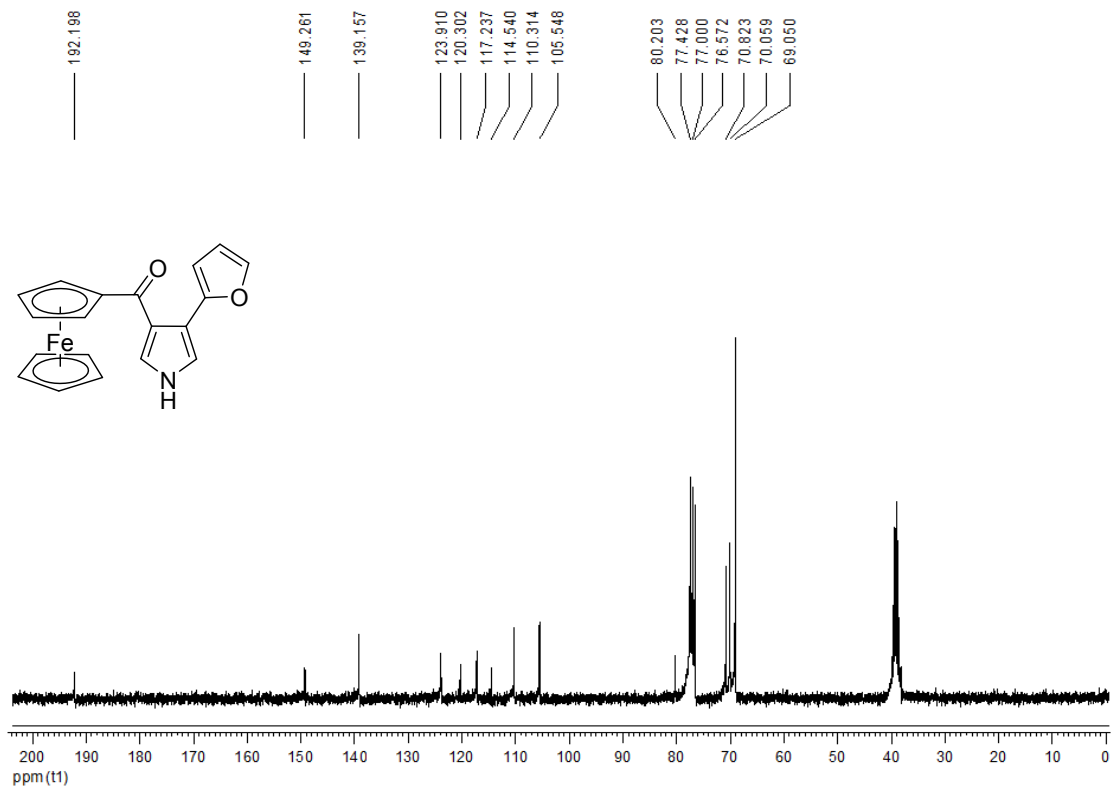

$^{13}\text{C}$  NMR (75 MHz,  $\text{DMSO-d}_6$ ): ferrocenyl(4-(furane-2-yl)-1*H*-pyrrol-3-yl)methanone **2g**

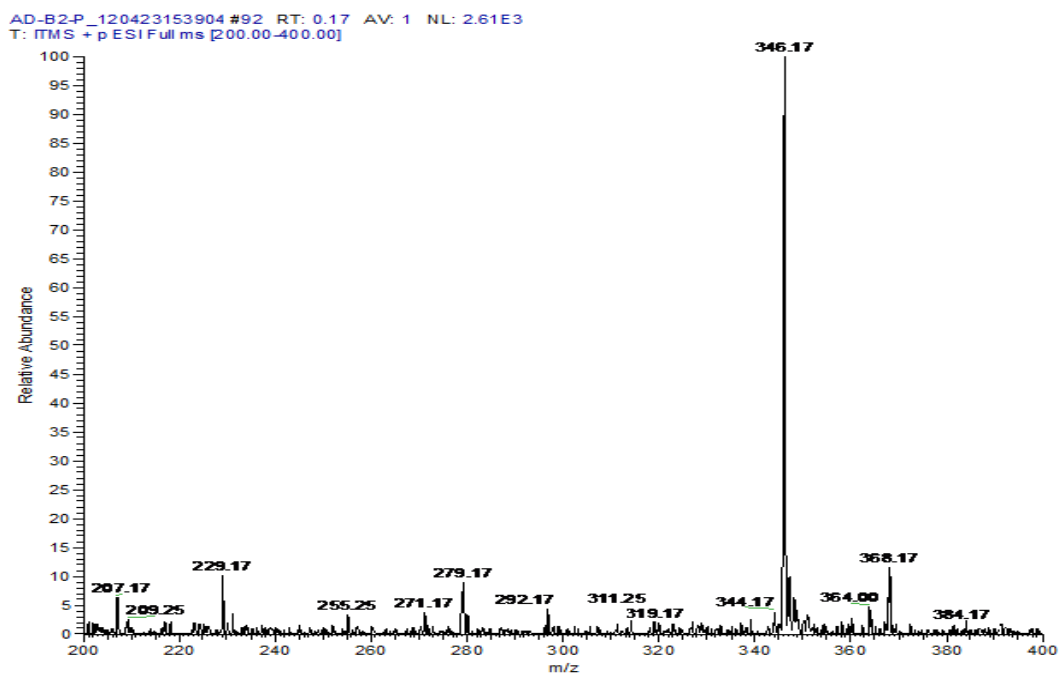

LC-MS: ferrocenyl(4-(furane-2-yl)-1*H*-pyrrol-3-yl)methanone **2g**

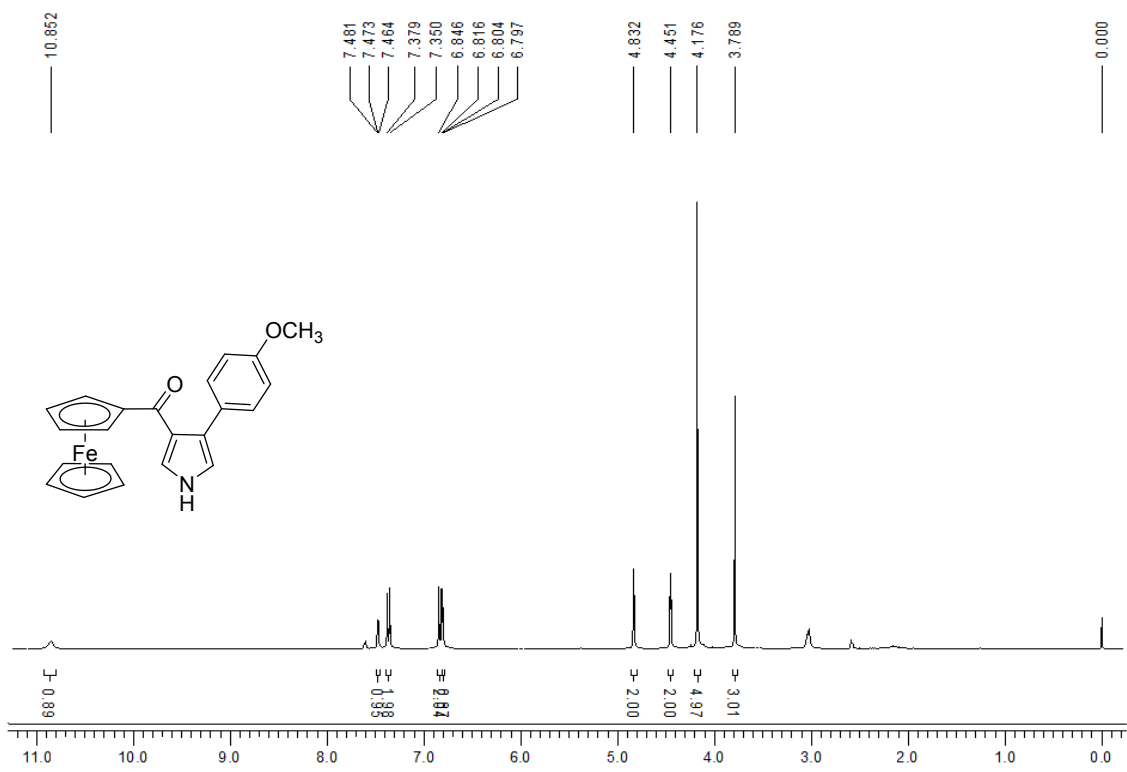

<sup>1</sup>H NMR (300 MHz, DMSO-d<sub>6</sub>): ferrocenyl(4-(4-methoxyphenyl)-1H-pyrrol-3-yl)methanone **2h**

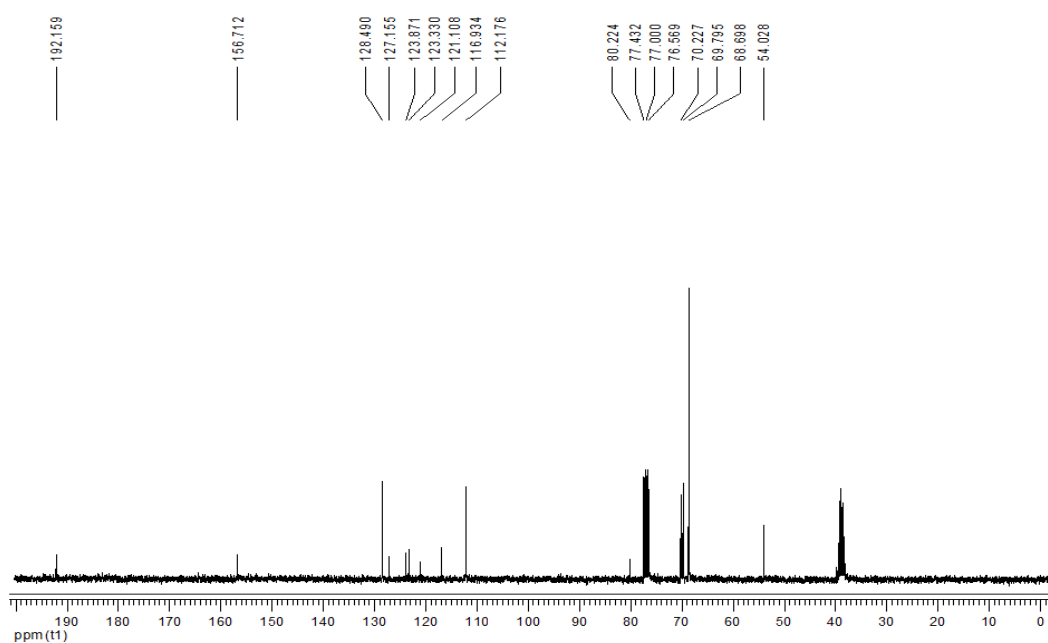

<sup>13</sup>C NMR (75 MHz, DMSO-d<sub>6</sub>): ferrocenyl(4-(4-methoxyphenyl)-1H-pyrrol-3-yl)methanone **2h**

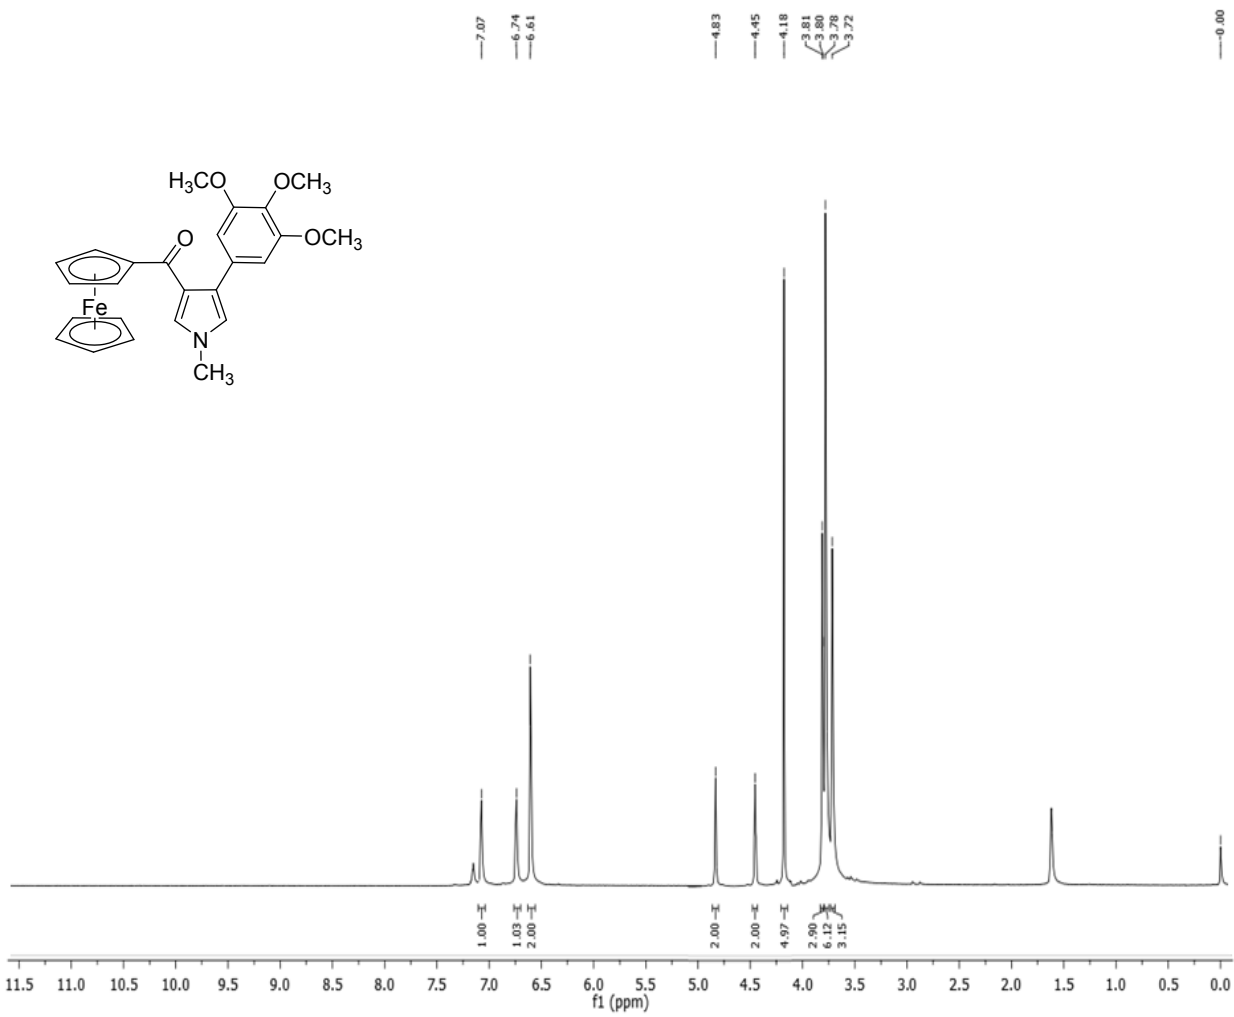

<sup>1</sup>H NMR (300 MHz, CDCl<sub>3</sub>): (1-methyl-4-(3,4,5-trimethoxyphenyl)-1H-pyrrol-3-yl)(ferrocenyl)methanone **3a**

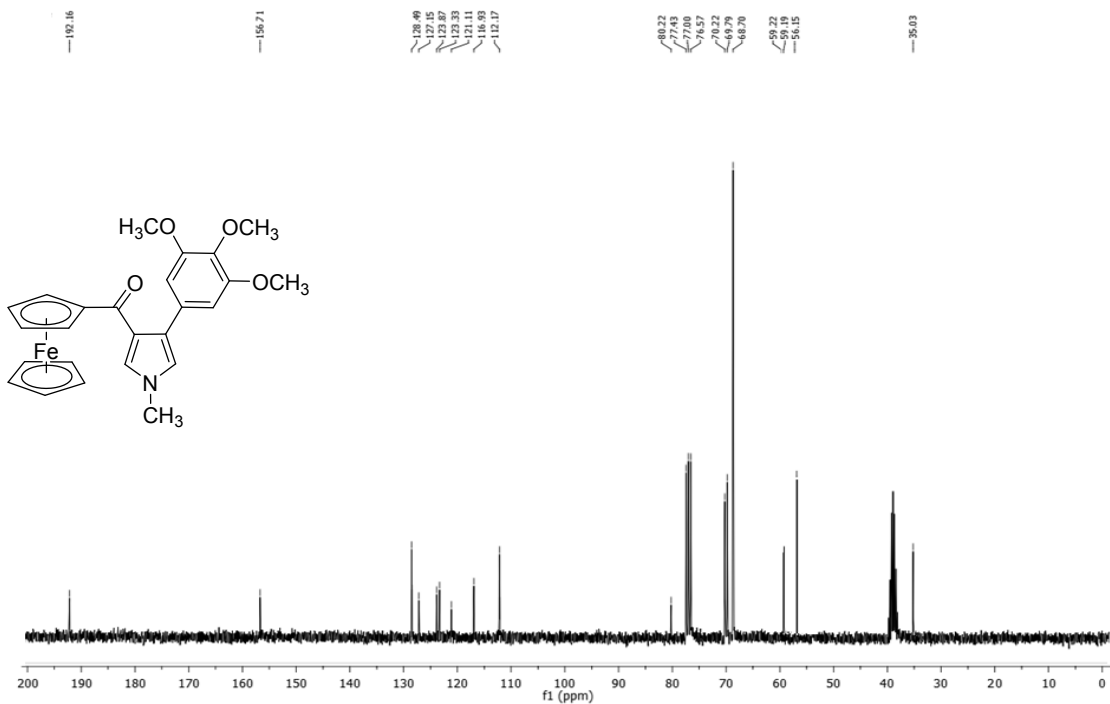

$^{13}\text{C}$  NMR (75 MHz,  $\text{DMSO-d}_6$ ): (1-methyl-4-(3,4,5-trimethoxyphenyl)-1H-pyrrol-3-yl)(ferrocenyl)methanone **3a**

N-ALKYL-10 121016165950 #23 RT: 0.33 AV: 1 NL: 5.99E4  
T: ITMS + cE SIFull ms [200.00-600.00]

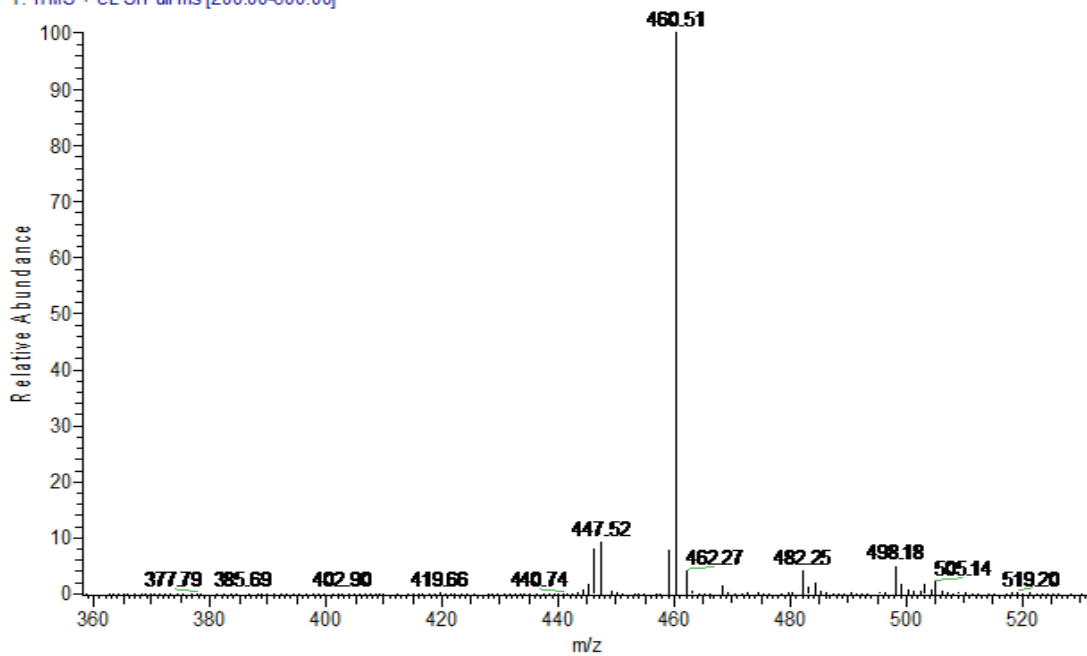

LC-MS: (1-methyl-4-(3,4,5-trimethoxyphenyl)-1H-pyrrol-3-yl)(ferrocenyl)methanone **3a**

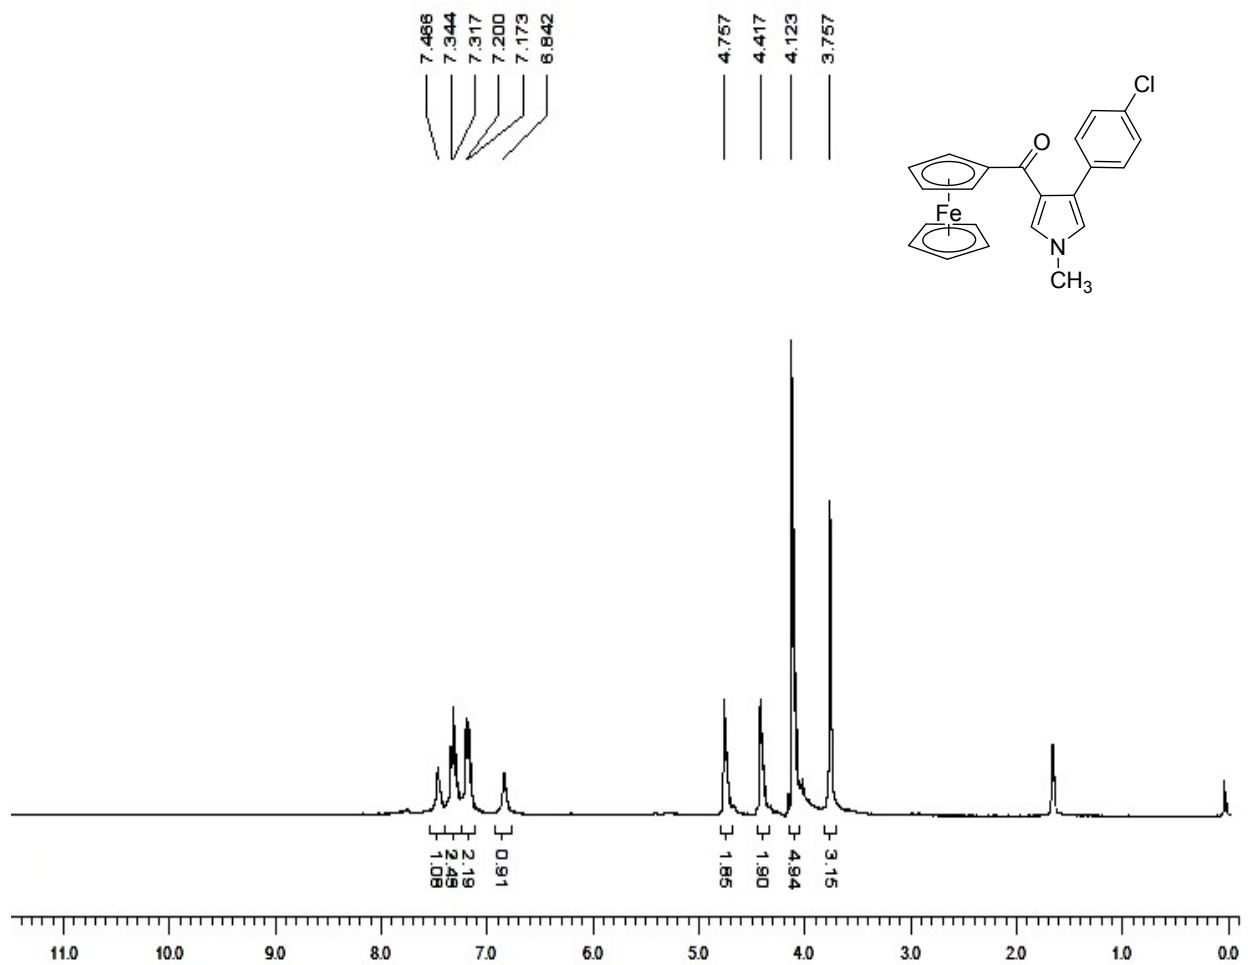

<sup>1</sup>H NMR (300 MHz, CDCl<sub>3</sub>): (1-methyl-4-(4-chlorophenyl)-1H-pyrrol-3-yl)(ferrocenyl)methanone **3b**



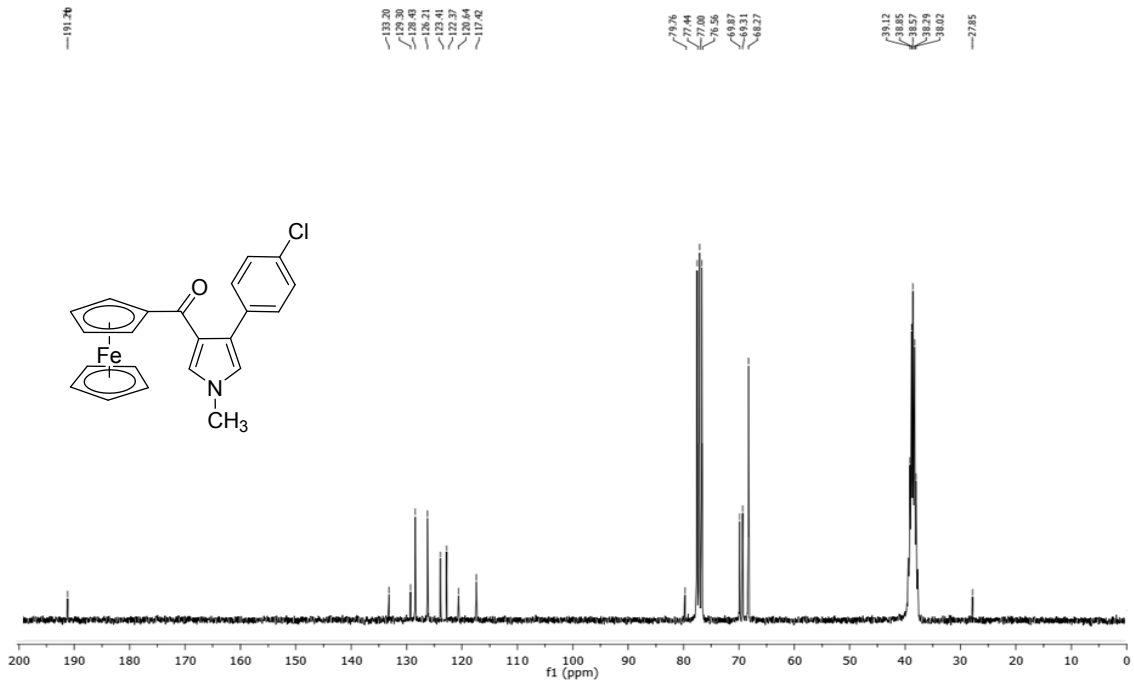

<sup>13</sup>C NMR (75 MHz, DMSO-d<sub>6</sub>): (1-methyl-4-(4-chlorophenyl)-1H-pyrrol-3-yl)(ferrocenyl)methanone **3b**

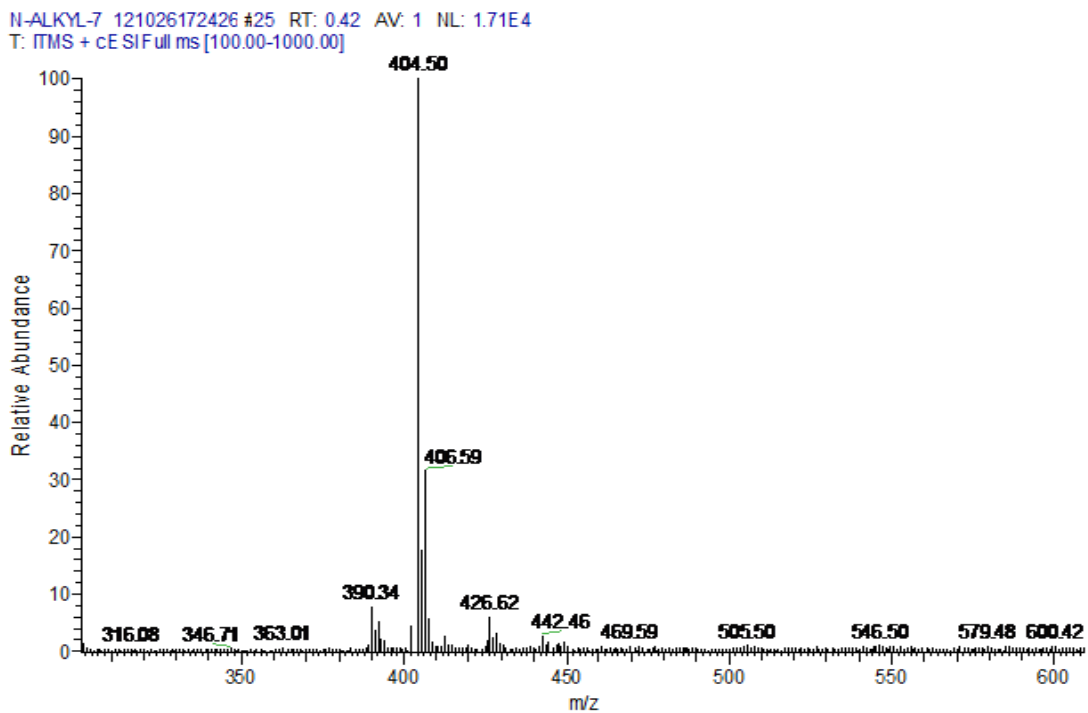

LC-MS: (1-methyl-4-(4-chlorophenyl)-1H-pyrrol-3-yl)(ferrocenyl)methanone **3b**

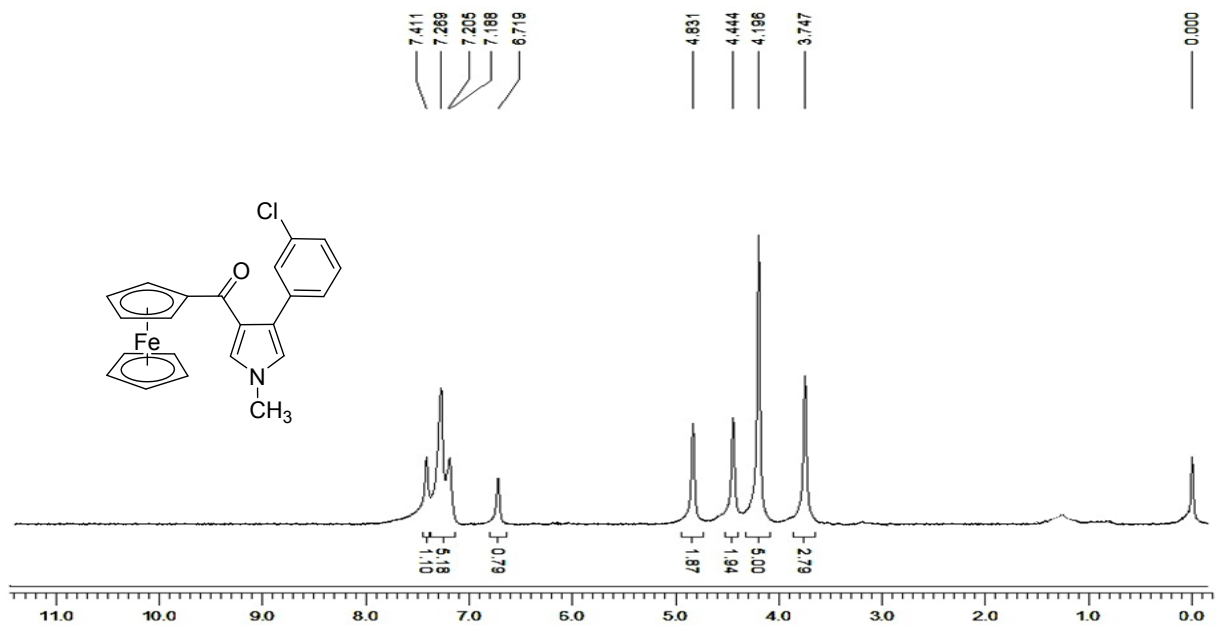

<sup>1</sup>H NMR (300 MHz, CDCl<sub>3</sub>): (1-methyl-4-(3-chlorophenyl)-1H-pyrrol-3-yl)(ferrocenyl)methanone **3c**

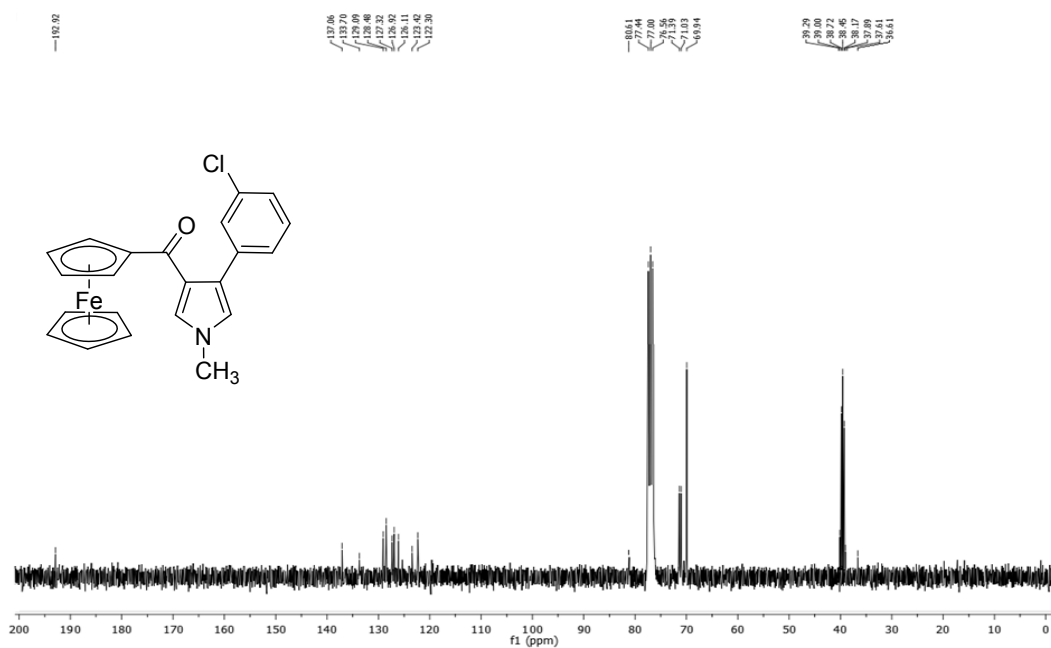

<sup>13</sup>C NMR (75 MHz, DMSO-d<sub>6</sub>): (1-methyl-4-(3-chlorophenyl)-1H-pyrrol-3-yl)(ferrocenyl)methanone **3c**

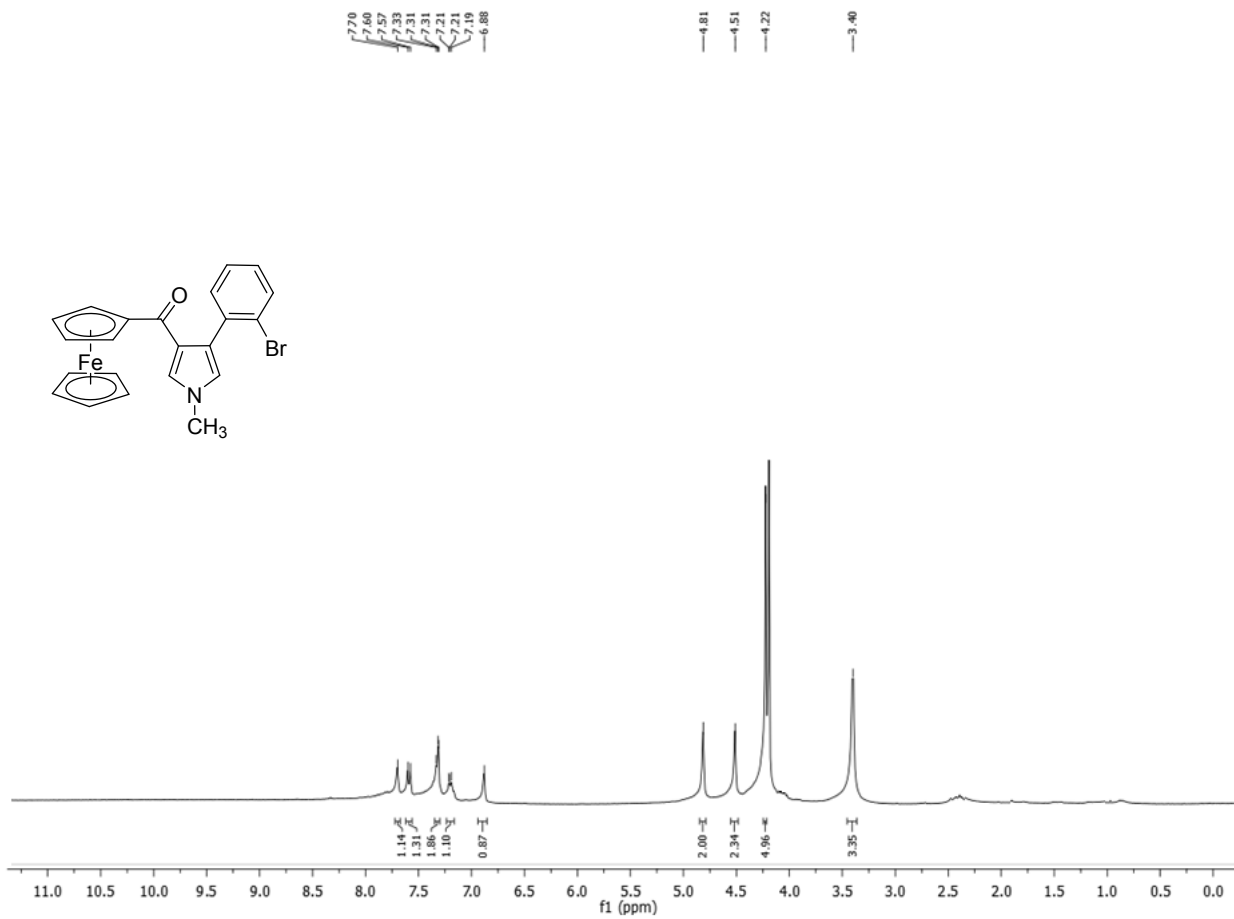

<sup>1</sup>H NMR (300 MHz, DMSO-d<sub>6</sub>): (1-methyl-4-(2-bromophenyl)-1H-pyrrol-3-yl)(ferrocenyl)methanone **3d**

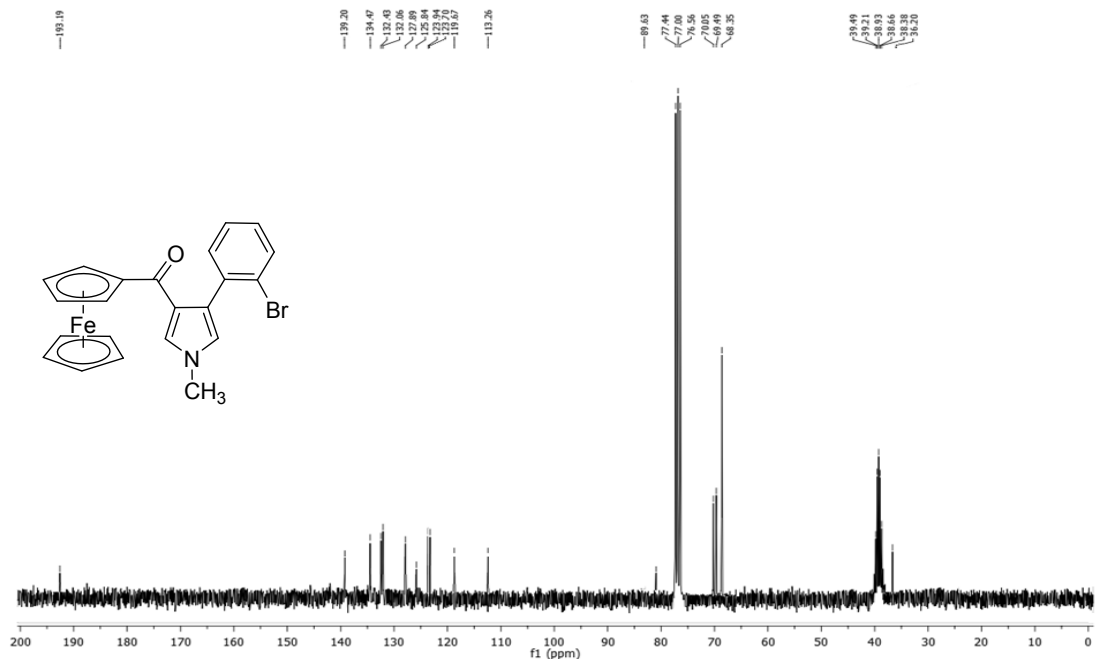

$^{13}\text{C}$  NMR (75 MHz,  $\text{DMSO-d}_6$ ): (1-methyl-4-(2-bromophenyl)-1*H*-pyrrol-3-yl)(ferrocenyl)methanone **3d**

N-ALKYL-11 121026172426 #26 RT: 0.45 AV: 1 NL: 1.14E4  
T: ITMS + cE SIFull ms [100.00-1000.00]

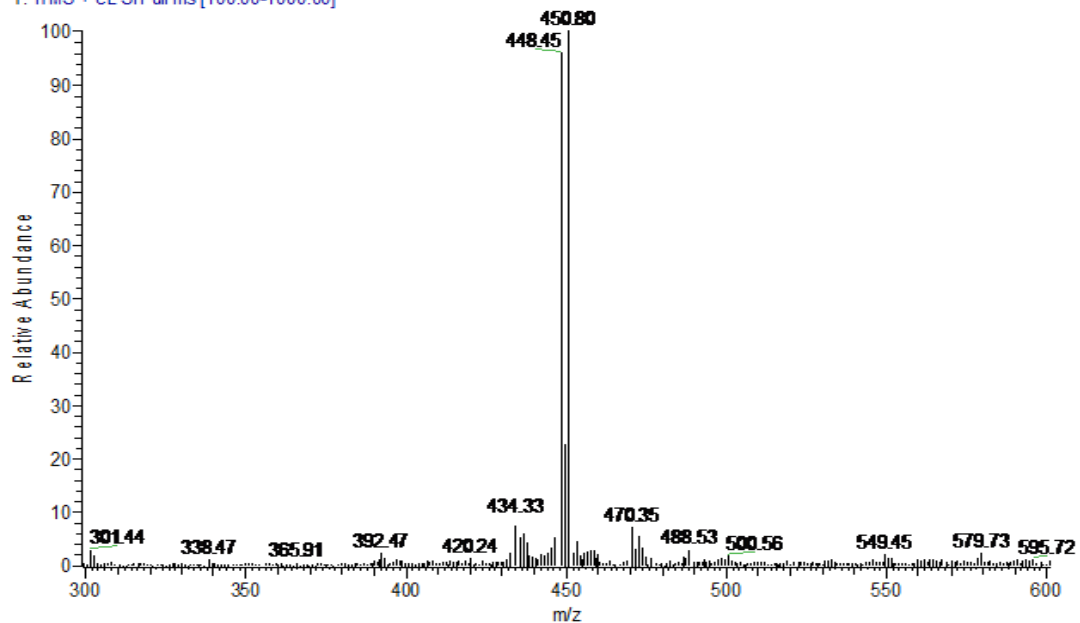

LC-MS: (1-methyl-4-(2-bromophenyl)-1*H*-pyrrol-3-yl)(ferrocenyl)methanone **3d**

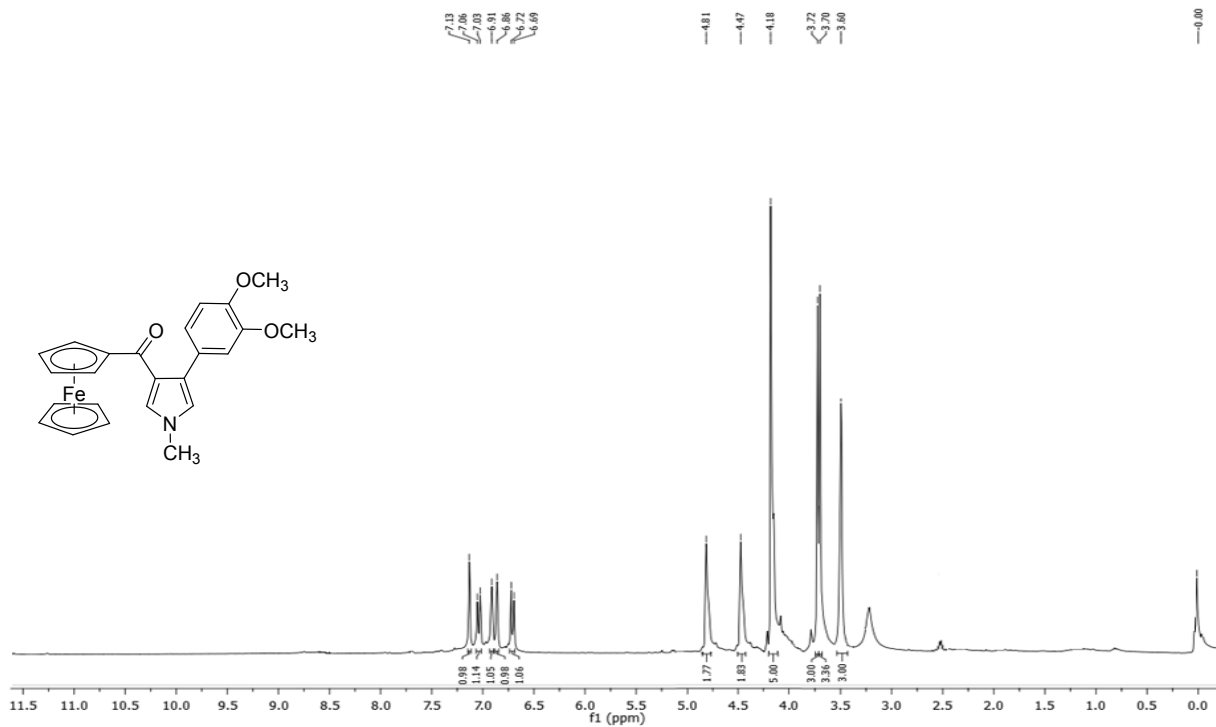

$^1\text{H}$  NMR (300 MHz,  $\text{DMSO-d}_6$ ): (1-methyl-4-(3,4-dimethoxyphenyl)-1H-pyrrol-3-yl)(ferrocenyl)methanone **3e**

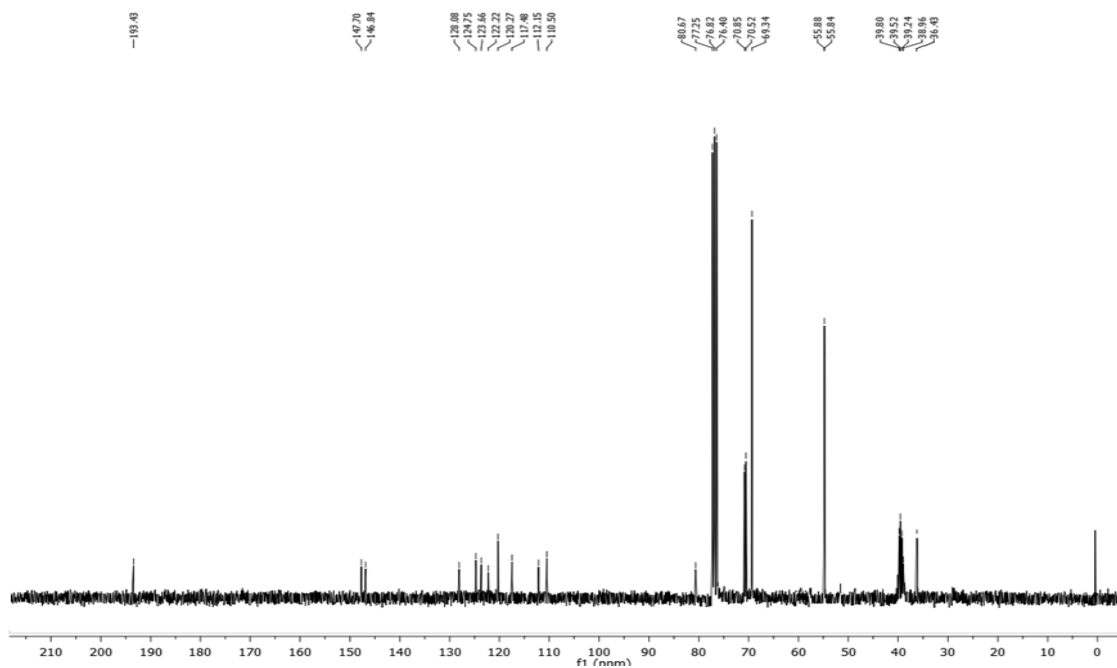

$^{13}\text{C}$  NMR (75 MHz,  $\text{DMSO-d}_6$ ): (1-methyl-4-(3,4-dimethoxyphenyl)-1H-pyrrol-3-yl)(ferrocenyl)methanone **3e**

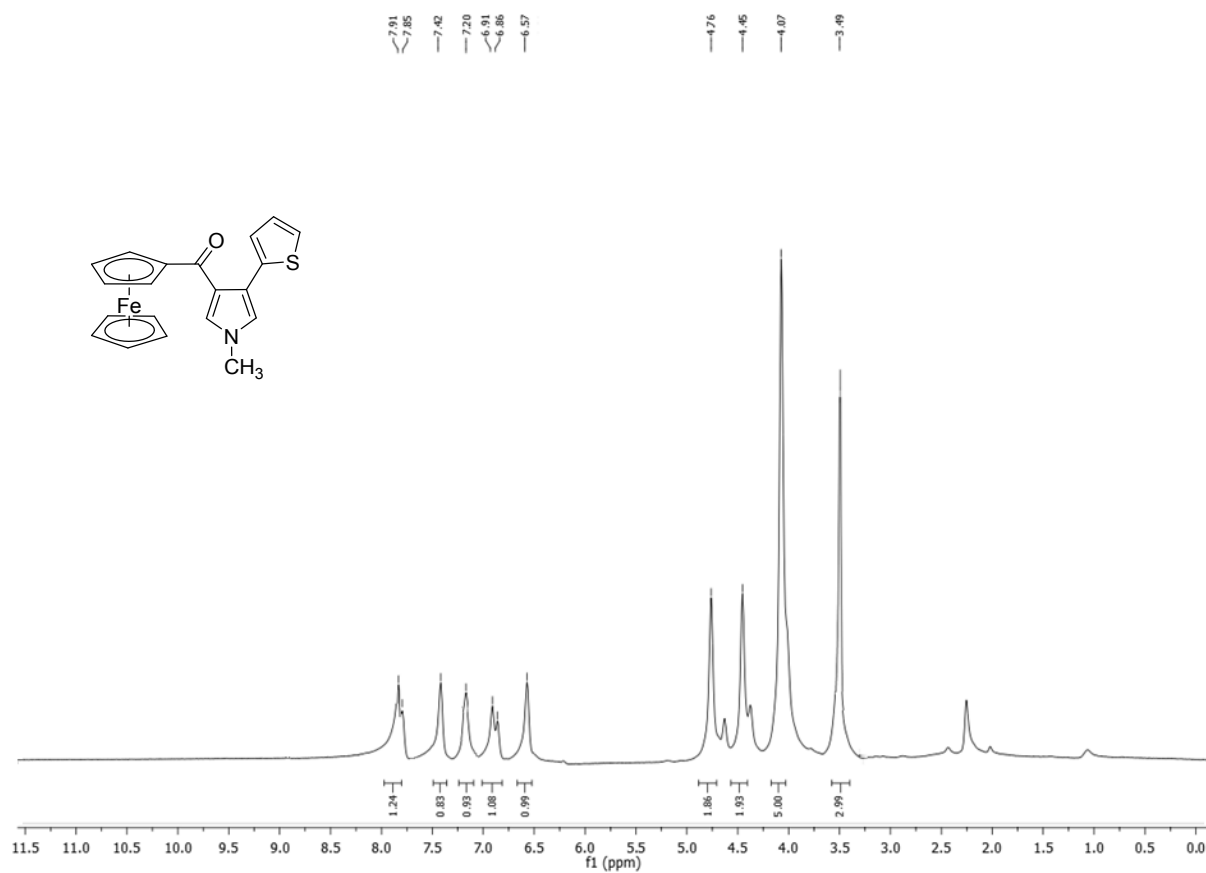

<sup>1</sup>H NMR (300 MHz, DMSO-d<sub>6</sub>): (1-methyl-4-(thiophen-2-yl)-1*H*-pyrrol-3-yl)(ferrocenyl)methanone **3f**

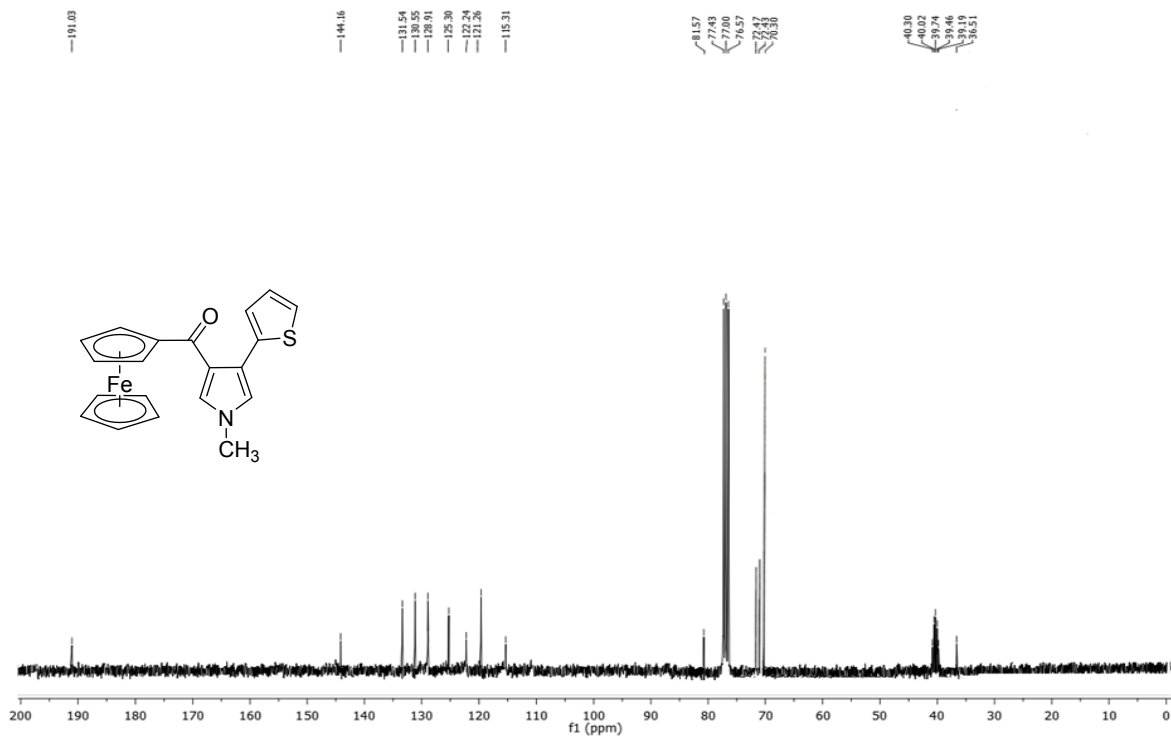

<sup>13</sup>C NMR (75 MHz, DMSO-d<sub>6</sub>): (1-methyl-4-(thiophen-2-yl)-1H-pyrrol-3-yl)(ferrocenyl)methanone **3f**

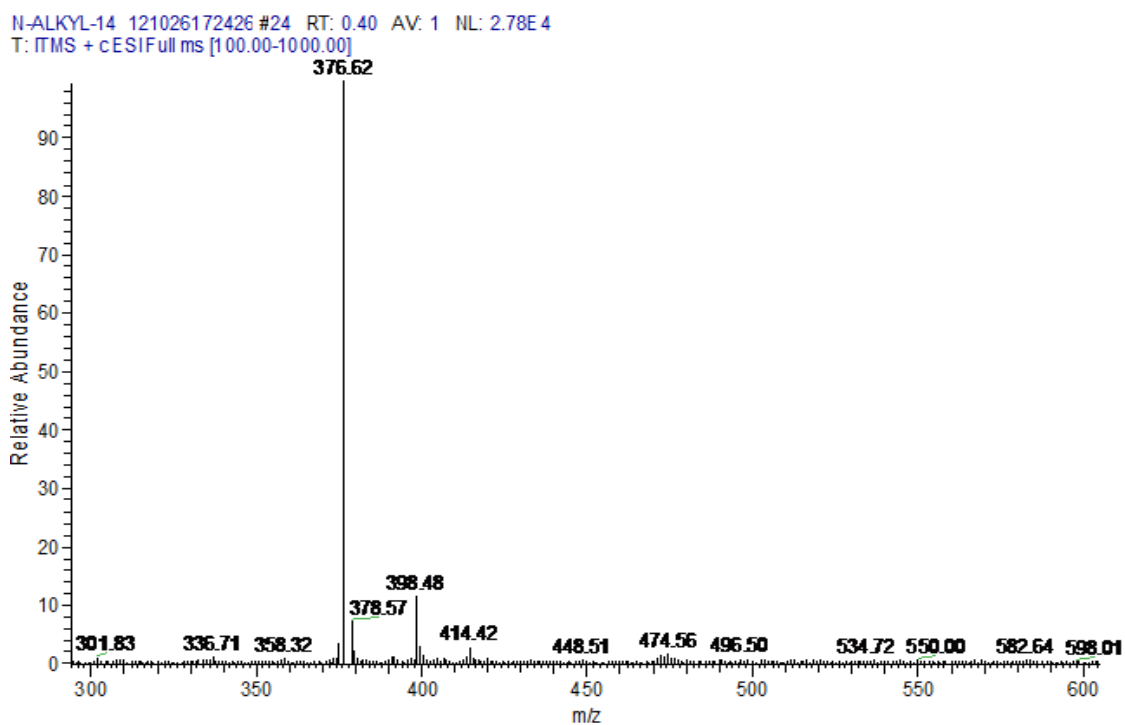

LC-MS: (1-methyl-4-(thiophen-2-yl)-1H-pyrrol-3-yl)(ferrocenyl)methanone **3f**

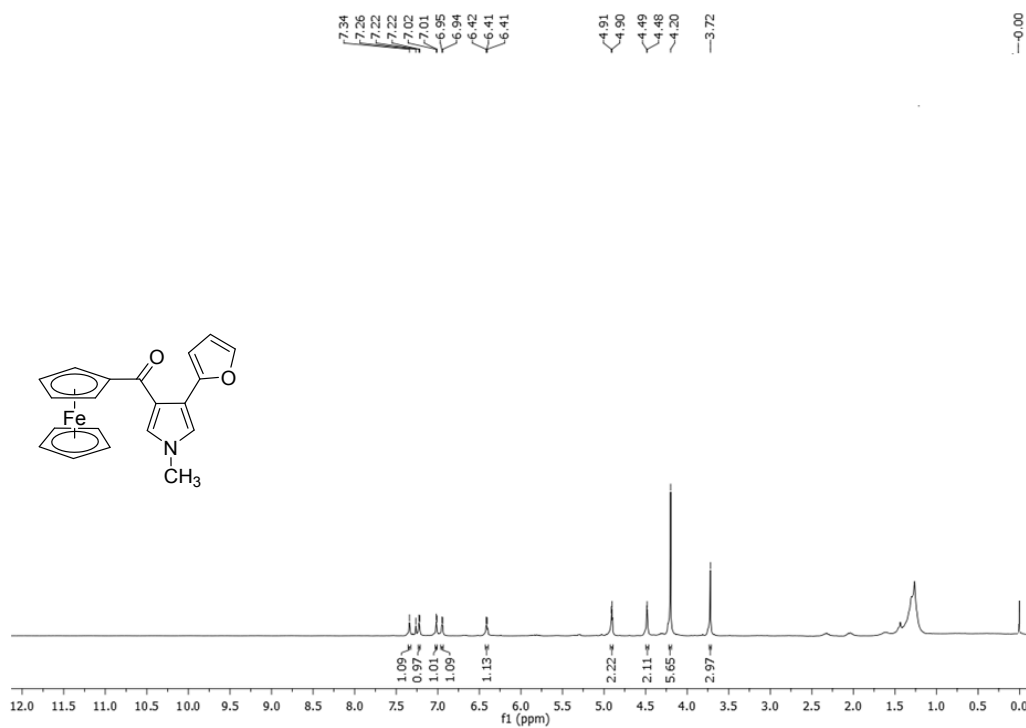

<sup>1</sup>H NMR (300 MHz, CDCl<sub>3</sub>): (1-methyl-4-(furan-2-yl)-1H-pyrrol-3-yl)(ferrocenyl)methanone **3g**

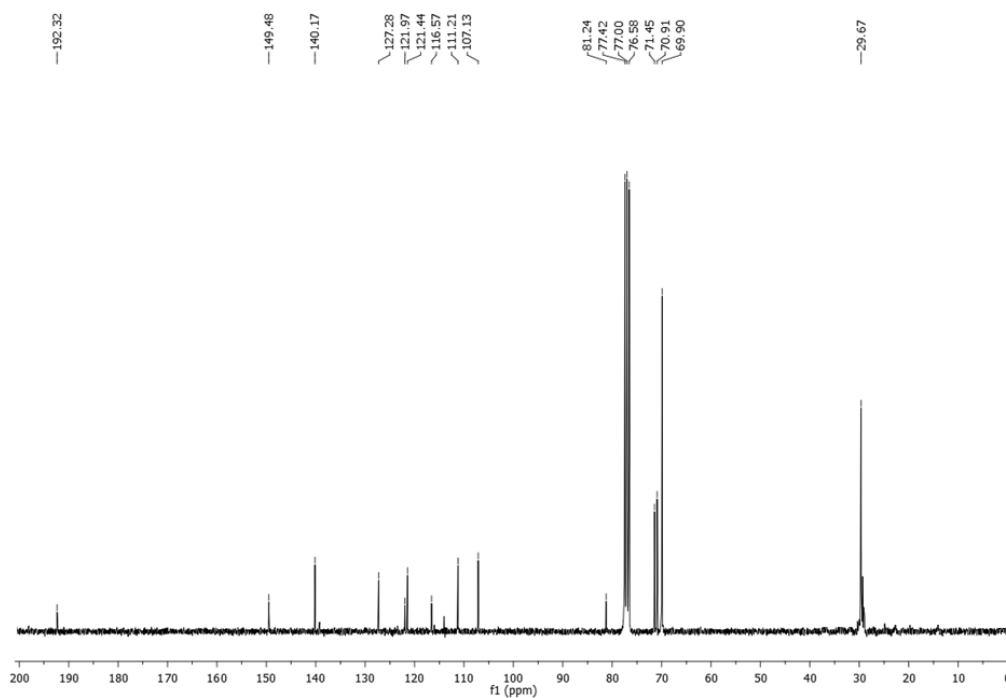

<sup>13</sup>C NMR (75 MHz, CDCl<sub>3</sub>): (1-methyl-4-(furan-2-yl)-1H-pyrrol-3-yl)(ferrocenyl)methanone **3g**



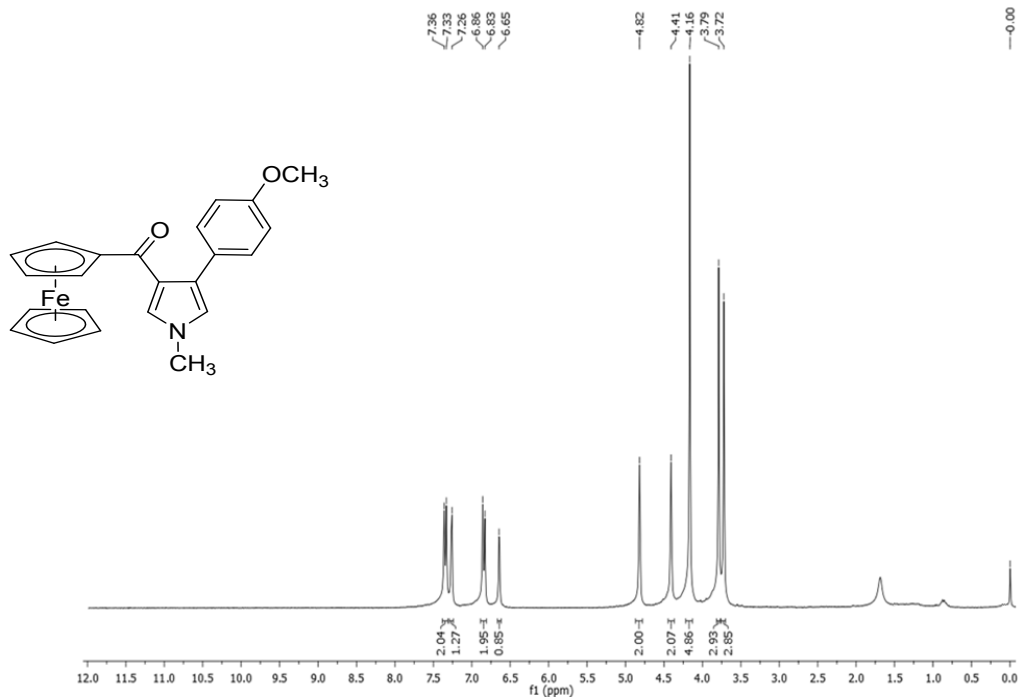

<sup>1</sup>H NMR (300 MHz, CDCl<sub>3</sub>): (1-methyl-4-(4-methoxyphenyl)-1H-pyrrol-3-yl)(ferrocenyl)methanone **3h**

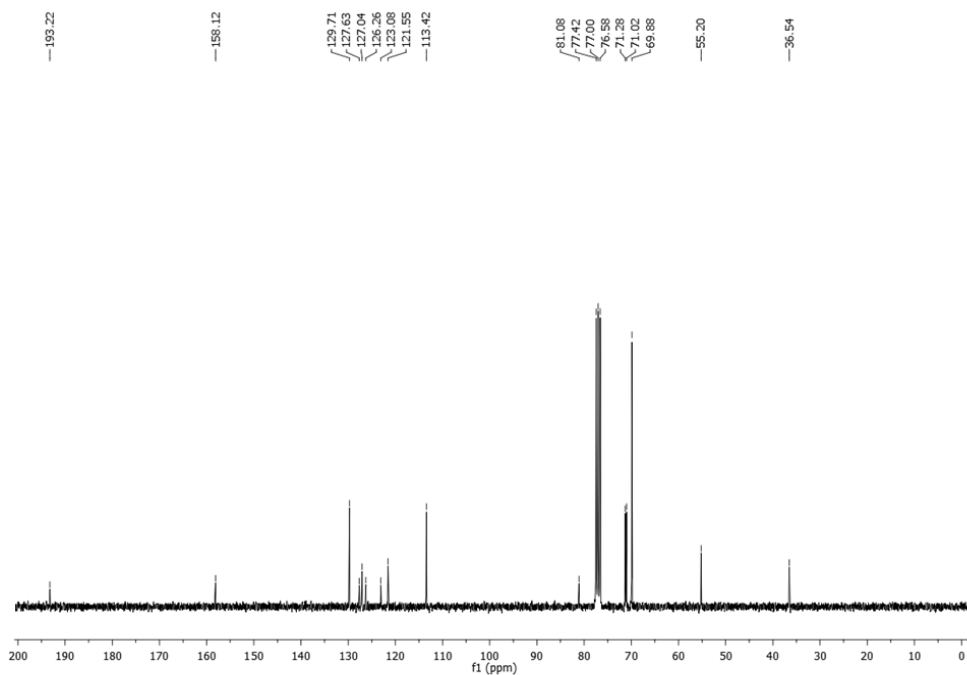

<sup>13</sup>C NMR (75 MHz, CDCl<sub>3</sub>): (1-methyl-4-(4-methoxyphenyl)-1H-pyrrol-3-yl)(ferrocenyl)methanone **3h**
